1 **A miR-124-mediated post-transcriptional mechanism**  
2 **controlling the cell fate switch of astrocytes to induced-**  
3 **neurons**

4 **Elsa Papadimitriou<sup>1</sup>, Paraskevi N. Koutsoudaki<sup>1,&</sup>, Timokratis Karamitros<sup>2,#</sup>, Dimitra**  
5 **Karagkouni<sup>3,#</sup>, Dafni Chroni-Tzartou<sup>4</sup>, Christos Gkemisis<sup>1</sup>, Maria Margariti<sup>1</sup>, Evangelia**  
6 **Xingi<sup>5</sup>, Irimi Thanou<sup>1</sup>, Socrates J. Tzartos<sup>4</sup>, Artemis G. Hatzigeorgiou<sup>3</sup>, Dimitra**  
7 **Thomaidou<sup>1,5,\*</sup>**

8 **Affiliations**

9 <sup>1</sup>Neural Stem Cells and Neuro-imaging Group, Department of Neurobiology, Hellenic  
10 Pasteur Institute

11 <sup>2</sup>Bioinformatics and Applied Genomics Unit, Department of Microbiology, Hellenic  
12 Pasteur Institute

13 <sup>3</sup>DIANA-Lab, Hellenic Pasteur Institute & Dept. of Computer Science and Biomedical  
14 Informatics, Univ. of Thessaly

15 <sup>4</sup>Laboratory of Molecular Neurobiology and Immunology, Department of  
16 Neurobiology, Hellenic Pasteur Institute

17 <sup>5</sup>Light Microscopy Unit, Hellenic Pasteur Institute

18 #equally contributing authors

19 &Present address: Molecular Carcinogenesis Group, Department of Histology and  
20 Embryology, Medical School, National and Kapodistrian University of Athens, Athens,  
21 Greece

22 \* Corresponding author

23 Email: [thomaidou@pasteur.gr](mailto:thomaidou@pasteur.gr)

24

25

26

27 **Abstract**

28 miRNA miR-124 has been employed supplementary to neurogenic TFs and other miRNAs to  
29 enhance direct neurogenic conversion by suppressing multiple non-neuronal targets. Aim of  
30 the study was to investigate whether miR-124 is sufficient to drive direct reprogramming of  
31 astrocytes to induced-neurons (iNs) on its own and elucidate its independent mechanism of  
32 reprogramming action. Our data show that miR-124 is a potent driver of the reprogramming  
33 switch of astrocytes towards an immature neuronal fate by directly targeting the RNA-binding  
34 protein Zfp36l1 and subsequently de-repressing Zfp36l1 neurogenic interactome. To this end  
35 miR-124 contribution in iNs production largely recapitulates endogenous neurogenesis  
36 pathways, being further enhanced upon addition of the neurogenic compound ISX9, which  
37 greatly improves both miR-124-induced reprogramming efficiency and iNs' functional  
38 maturation. Importantly, miR-124 is potent to guide direct neuronal reprogramming of  
39 reactive astrocytes to iNs of cortical identity *in vivo* following cortical trauma, a novel finding  
40 confirming its robust reprogramming action under neuroinflammatory conditions.

41

42

43

44

45

46

47

48

49

50

## 51 **Introduction**

52 Direct astrocytic reprogramming to induced-neurons (iNs) is a powerful approach for  
53 manipulating cell fate, as it takes advantage of the intrinsic neural stem cell (NSC) potential of  
54 reactive astrocytes (Magnusson et al. 2014), while it offers the possibility of reprogramming  
55 resident brain cells. To this end astrocytic cell fate conversion to iNs has been well-established  
56 in vitro (Berninger et al. 2007; Heinrich et al. 2010; Aravantinou-Fatorou et al. 2015) and in  
57 vivo (Guo et al. 2014; Torper et al. 2013; Mattugini et al. 2019) using combinations of  
58 transcription factors (TFs) or chemical cocktails (L. Zhang et al. 2015; Xiang Li et al. 2015; Gao  
59 et al. 2017). Challenging the expression of lineage-specific TFs during reprogramming is  
60 accompanied by changes in the expression of regulatory RNAs, mostly miRNAs, that post-  
61 transcriptionally modulate high numbers of neurogenesis-promoting factors, indicating that  
62 miRNAs act as key regulators of cell fate conversion (Xuekun Li and Jin 2010). To this end,  
63 miRNAs have been introduced, supplementary or alternatively to TFs, to instruct direct  
64 neuronal reprogramming (Yoo et al. 2011).

65 Among neurogenic miRNAs, miR-124 has been shown to contribute to efficient neurogenic  
66 conversion of fibroblasts when coupled with certain TFs or other miRNAs, in particular miR-  
67 9/9\*, and the strong neuronal reprogramming potential of this cocktail has been elaborately  
68 studied at the transcriptomic and epigenetic level (Ambasudhan et al. 2011; Abernathy et al.  
69 2017; Wohl and Reh 2016; Victor et al. 2014). miR-124 is the most abundant miRNA in the  
70 CNS, participating both in embryonic (Maiorano and Mallamaci 2009) and adult neurogenesis  
71 (Cheng et al. 2009; Åkerblom et al. 2012), while its expression persists in mature neurons (Deo  
72 et al. 2006). miR-124 acts globally to increase the expression levels of neuronal genes, by  
73 repressing components of major neuronal gene repressor complexes, such as the anti-neural  
74 transcriptional repressor REST complex (Visvanathan et al. 2007; Baudet et al. 2012; Volvert  
75 et al. 2014) and the Polycomb Repressive Complex 2 (PRC2) (Neo et al. 2014; S. W. Lee et al.  
76 2018), while it also participates at the post-transcriptional regulation of neuronal transcripts  
77 by targeting the neuron-specific splicing global repressor Ptbp1 (Makeyev et al. 2007). Besides  
78 its roles in transcriptional and post-transcriptional regulation, miR-124 neurogenic action also  
79 relates to chromatin dynamics, as it acts as a key mediator of a chromatin permissive  
80 environment for neuronal reprogramming through its involvement in the formation of the  
81 neuron specific chromatin remodeling complex nBAF (Yoo et al. 2009).

82 However, although miR-124 has been lately utilized in many reprogramming cocktails for the  
83 neurogenic conversion of fibroblasts (Ambasudhan et al. 2011; Birtele et al. 2019; Jiang et al.

84 2015; Victor et al. 2018; Yoo et al. 2011), neither its potential to induce fate conversion of  
85 astrocytes to iNs *in vitro* or *in vivo*, nor its mechanism of action in instructing direct  
86 reprogramming on its own have been investigated. In this study we show that miR-124 is  
87 sufficient to instruct reprogramming of cortical astrocytes to immature induced-neurons (iNs)  
88 *in vitro* controlling the reprogramming “switch” of astrocytes towards the neuronal fate by  
89 down-regulating genes with important regulatory roles in astrocytic function. Among these  
90 we identified for the first time the RNA binding protein Zfp3611, implicated in ARE-mediated  
91 mRNA decay (Lai et al. 2000), as a direct target of miR-124 and further found certain neuronal-  
92 specific Zfp3611 targets that participate in cortical development being de-repressed in miR-  
93 124-iNs, implying that miR-124-induced reprogramming recapitulates pathways of  
94 endogenous cortical neurogenesis. Importantly, by blocking miR-124 specific binding in  
95 Zfp3611 3’UTR, we revealed that miR-124/Zfp3611 interaction is one of the drivers of miR-124-  
96 induced astrocytic cell fate switch and induction of neuronal identity. To enhance the  
97 neuronal differentiation of reprogrammed immature iNs, we combined miR-124 with  
98 isoexasole-9 (ISX9) chemical compound known to possess neurogenesis-promoting properties  
99 (Schneider et al. 2008; Xiang Li et al. 2015). Our functional and mechanistic analysis of the two  
100 molecules combination revealed that *in vitro* addition of ISX9 promoted both the neurogenic  
101 conversion and greatly enhanced the functional maturation of miR-124+ISX9-iNs reinforcing  
102 their passage through a Tbr2+ intermediate stage. Importantly, *in vivo* miR-124 was also  
103 potent either alone or along with ISX9, to guide neuronal reprogramming of reactive  
104 astrocytes to iNs following cortical trauma, with the vast majority of iNs exhibiting deep-layer  
105 cortical identity, implying the strong miR-124 reprogramming capacity within the injured brain  
106 micro-environment.

## 107 **Results**

### 108 **miR-124 is sufficient to instruct reprogramming of postnatal cortical astrocytes to immature** 109 **induced- neurons (immature-iNs)**

110 In order to study the potential of miR-124 to instruct neuronal reprogramming of astrocytes  
111 on its own, cultured postnatal day3-5 (P3-5) mouse cortical astrocytes were transfected with  
112 the miR-124-3p mimic 3 times every two days and were supplemented with the antioxidants  
113 vitamin E and ascorbic acid (**Fig.1A**). After 1 week (day7) nearly 35% of miR-124 over-  
114 expressing cells in culture were Tuj1+ exhibiting multipolar morphology (**Fig.1B,C**), as  
115 compared to control astrocytes that received scrambled miRNA (sc-miRNA) (**Suppl.Fig.1A**),  
116 where no Tuj1positivity was detected. Still, miR-124-iNs exhibited low differentiation  
117 potential and only 19% of the cells remained Tuj1+ at day14 of the reprogramming protocol  
118 (**Fig.1B, C**). The ability of miR-124 to instruct neurogenic reprogramming was further  
119 supported by RT-qPCR expression analysis of several neurogenic transcription factors (TFs) at  
120 day7, where miR-124 overexpression induced the up-regulation of the mRNA levels of the  
121 proneural bHLH TFs *Mash1* and to a lesser extend *Neurog2* (**Fig.1D**), while it additionally up-  
122 regulated TFs related to both dorsal (*Tbr2*, *Tbr1*, *Fezf2* and *Cux1*) (**Fig.1E**) and ventral  
123 telencephalon development (*Gsx2*, *Dlx1*) (**Fig.1F**). We also observed up-regulation of TFs  
124 related to neuronal differentiation (*Sox4*, *Sox11*, *Hes6*) (**Fig.1G**), however we failed to detect  
125 an up-regulation of *NeuroD1* (**Fig.1G**), which is known to play a crucial role in neuronal  
126 reprogramming (Pataskar et al. 2016; Guo et al. 2014; Matsuda et al. 2019). Instead, miR-124  
127 significantly reduced *NeuroD1* mRNA levels, implying that this reduction may contribute to  
128 the low differentiation capacity of miR-124-iNs. Further, immunofluorescence analysis  
129 indicated that the majority of miR-124-iNs (nearly 80%) were Mash1+ and also exhibited low  
130 Tbr2 expression (nearly 70%), while only a small percentage of reprogrammed cells (15%)  
131 were positive for the ventral TF Gsx2 (**Fig.1H, I**), indicating that the Mash1-Tbr2 trajectory is  
132 most prominently activated in the majority of miR-124-iNs.

### 133 **The neurogenic compound ISX9 greatly enhances the miR-124-induced reprogramming** 134 **efficiency and differentiation state of iNs**

135 The observed down-regulation of NeuroD1 by miR-124 prompted us to supplement the  
136 reprogramming medium from day2 to day10 with the chemical compound ISX9, known to up-  
137 regulate NeuroD1 levels and enhance neuronal differentiation (Schneider et al. 2008). Indeed,  
138 the addition of ISX9 led to the acquisition of a more differentiated neuronal-like phenotype

139 with a smaller soma and longer projections (**Fig.2A**) and significantly increased the percentage  
140 of Tuj1+ reprogrammed cells to 62% at day7, with an average of 38% of them being detected  
141 at day14 (**Fig.2B**). Importantly, ISX9 was potent to reverse the miR-124-induced reduction of  
142 NeuroD1 mRNA levels (**Fig.2C**) and to greatly elevate the transcriptional levels of *Neurog2* and  
143 *Tbr2* peaking at day7 (**Fig.2D**), while it also induced a moderate reduction in the mRNA levels  
144 of *Mash1* (**Fig.2E**). Interestingly, ISX9 was not able to induce reprogramming of astrocytes on  
145 its own (sc-miRNA+ISX9) (**Suppl.Fig.1B**), despite evoking robust up-regulation of the mRNA  
146 levels of *NeuroD1* (**Fig.2D**) and other neurogenic TFs (**Suppl.Fig.1C**) and to a small, but  
147 significant, extend the protein levels of Mash1 and Tbr2 (**Suppl.Fig.1D, E**). However, addition  
148 of ISX9 in the reprogramming medium along with miR-124 significantly increased the  
149 percentage of Tbr2+/Tuj1+ iNs, without significantly affecting either the percentage of  
150 Mash1+/Tuj1+ iNs or Gsx2+/Tuj1+ iNs relative to miR-124 alone (**Fig.2F, G**). Quantification of  
151 the protein levels of Mash1 and Tbr2 by measuring their mean nuclear fluorescence intensity  
152 in miR-124-iNs and miR-124+ISX9-iNs at day7, revealed a significant enhancement of Tbr2  
153 protein levels (**Fig.2H**) and a down-regulation of Mash1 levels (**Fig.2I**) following ISX9 addition.

154 These results led us to the inference that addition of ISX9 in the reprogramming medium  
155 reinforces the passage of miR-124+ISX9-iNs through a Tbr2+ intermediate stage, which seems  
156 to be the main reprogramming route these iNs follow. Interestingly, the addition of ISX9 also  
157 significantly enhanced the expression of *Insm1* (**Suppl.Fig.1F**), a key transcriptional regulator  
158 of intermediate progenitors (IPs) (Elsen et al. 2018), further supporting the notion that iNs  
159 pass through an intermediate stage bearing molecular characteristics of endogenous IPs.

#### 160 **miR-124+ISX9-iNs exhibit characteristics of mature, electrophysiologically active neurons**

161 The majority of miR-124-iNs and miR-124+ISX9-iNs were positive for the cortical deep-layer  
162 TF Tbr1 at day14 (**Suppl.Fig.2A, B**). We mainly observed a moderate nuclear Tbr1 expression  
163 in miR-124-iNs, whereas miR-124+ISX9-iNs exhibited strong cytoplasmic Tbr1 expression,  
164 besides a moderate nuclear one (**Suppl.Fig.2A**). After 21 days in culture, nearly 80% of Tuj1+  
165 miR-124+ISX9-iNs were also positive for the mature neuronal markers MAP2 and Synapsin1,  
166 exhibiting a differentiated neuronal morphology (**Fig3.A,B**), while miR-124-iNs at day21 did  
167 not exhibit signs of further maturation and only a small percentage of them were positive for  
168 MAP2 and Synapsin1 (**Fig.3B**). Additionally, at day28 the majority of miR-124+ISX9-iNs (nearly  
169 90%) were positive for the glutamatergic marker vGlut1 (**Fig.3C, D**), while only 12% of them  
170 were found positive for GABA (**Fig.3D, Suppl.Fig.2C**).

171 In order to further establish the functional maturation state of miR-124-iNs and miR-  
172 124+ISX9-iNs we performed electrophysiological analysis with whole-cell voltage-clamp and  
173 current-clamp recordings at different time points from day15 to day27. Rapidly inactivating  
174 inward Na<sup>+</sup> currents and persistent outward K<sup>+</sup> currents were recorded in miR-124+ISX9-iNs  
175 after 22 days in culture (n=47 out of 80 analyzed cells) in response to depolarizing voltage  
176 steps (**Fig.3E, left panel, Fig. 3F**), while further application of TTX and TEA – selective Na<sup>+</sup>  
177 channels' (Na<sub>v</sub>) and K<sup>+</sup> channels' (K<sub>v</sub>) blockers respectively – confirmed that the Na<sub>v</sub> were  
178 responsible for the inward currents and K<sub>v</sub> for the outward currents (**Fig.3E, middle and right**  
179 **panels**). A small amount of K<sub>v</sub> channels started being present in miR-124+ISX9-iNs before  
180 day21, while they became more evident in days 23-27 (**Fig.3F**), in accordance with the ability  
181 of almost all recorded miR-124+ISX9-iNs (n=21 out of 30 recorded cells) to generate repetitive  
182 action potentials (APs) upon membrane depolarization (**Fig.3G**). Finally, rare spontaneous  
183 post-synaptic current activity was detected in few mature miR-124+ISX9-iNs (day27) (**Fig.3H**).  
184 On the other hand, miR-124-iNs exhibited lower amounts of Na<sub>v</sub> and K<sub>v</sub> channels (not shown)  
185 and thus were not capable of firing action potentials (APs) (n=15 cells).

186 The majority (80%) of miR-124+ISX9-iNs (**Fig.3I**) and a few miR-124-iNs (not shown) were  
187 capable of responding to different concentrations of GABA early in the course of their  
188 maturation (day22), even before the appearance of APs, which is in compliance with the  
189 expression of GABA receptors in early stages of neuronal development (Luján, Shigemoto, and  
190 López-Bendito 2005). Additionally, miR-124+ISX9-iNs were capable of responding to L-  
191 glutamate in a concentration dependent manner (**Fig.3J**), while L-glutamate-sensitive inward  
192 current was completely blocked after co-application of 100μM L-glutamate and 20μM CNQX,  
193 indicating the presence of AMPA/kainite receptors (**Fig.3K**).

#### 194 **miR-124 and ISX9 exhibit both independent and cooperative transcriptional contributions** 195 **in the reprogramming process to iNs**

196 To in-depth analyze the molecular mechanism through which miR-124 contributes to the  
197 reprogramming process either alone or following ISX9 supplementation, we performed RNA-  
198 sequencing of miR-124-iNs and miR-124+ISX9-iNs at day7, using as controls astrocytes  
199 obtained the initial day of the reprogramming (day1) and sc-miRNA transfected astrocytes at  
200 day7. The differential expression analysis was performed between day7 miR-124-iNs or miR-  
201 124+ISX9-iNs and day1 astrocytes (astro) (miR-124-iNs vs astro and miR-124+ISX9-iNs vs astro  
202 respectively), whereas the day7 sc-miRNA-transfected astrocytes (sc-miRNA astro) were used  
203 as the ultimate control for the analysis of miR-124 target genes (see Fig.5 below). We

204 identified 4,233 differentially expressed genes (DEGs) in miR-124-iNs vs astro and 6,652 DEGs  
205 in miR-124+ISX9-iNs vs astro ( $1 \leq \log_2(\text{fold change}) \leq -1$ ,  $\text{FDR} < 0.05$ ) (**Suppl.Fig.3A**).

206 Heat map analysis of DEGs (miR-124-iNs vs astro and miR-124+ISX9-iNs vs astro) that belonged  
207 to the GO terms: Glial cell differentiation, Gliogenesis, Astrocyte development, Generation of  
208 neurons, Neuron differentiation, Regulation of neuron differentiation, Neurotransmitter  
209 transport and Synaptic signaling (**Fig.4A**) indicated that miR-124 alone efficiently down-  
210 regulated a gene cluster enriched in astrocytic genes (**Cluster I**), with a small additional  
211 contribution from ISX9. At the same time miR-124 up-regulated a gene cluster of neuronal  
212 specific genes (**Cluster III**) that was to a large extent further up-regulated by ISX9  
213 supplementation, while ISX9 highly up-regulated a neuronal specific gene cluster (**Cluster II**)  
214 that was most exclusively expressed in miR-124+ISX9-iNs.

215 GO enrichment analysis of biological processes for the up-regulated DEGs of both miR-124-  
216 iNs vs astro and miR-124+ISX9-iNs vs astro, further revealed that miR-124 alone up-regulated  
217 genes related to generation of neurons and neuron differentiation as well as to more specific  
218 neuronal functions mostly associated to synaptic transmission (**Fig.4B in orange**), while the  
219 addition of ISX9 greatly enhanced the number of up-regulated genes related not only to  
220 similar GO terms up-regulated by miR-124, but also to more mature neuronal functions such  
221 as action potential, axon development and subtype specific synaptic transmission (**Fig.4B in**  
222 **red**). Furthermore, enrichment analysis of the down-regulated DEGs of miR-124-iNs vs astro  
223 indicated that many of them were related to cell cycle, gliogenesis, and astrocyte  
224 differentiation (**Fig.4C**). Interestingly, this analysis revealed a strong effect of miR-124 in  
225 down-regulating components of many signaling pathways, including MAPK, PKB, canonical  
226 Wnt, TGF- $\beta$ , BMP, Notch and JAK/Stat signaling pathways (**Fig.4C**), known to play important  
227 roles in astrocytic identity and function (Gross et al. 1996; Acaz-Fonseca et al. 2019; Kang and  
228 Hébert 2011; Yang et al. 2012).

229 Since reprogramming is a process that implicates great changes in the transcriptomic, post-  
230 transcriptomic and epigenetic landscape of trans-differentiating cells, we sought to identify  
231 the differentially expressed transcription factors (TFs), epigenetic factors (EFs) and RNA  
232 binding proteins (RBPs) in our datasets that could possibly drive the reprogramming process.  
233 Heat map analysis of astrocytic TFs (**Suppl.Fig.3B**) indicated that miR-124 alone potently  
234 down-regulated TFs related to astrocytic function such as *Id1*, *Id3*, *Tcf4*, *Tcf7l1*, *Rbpj*, *Nfic*,  
235 *Zcchc24*, *Pparg*, *Nr3c1* and *Tead1*, while the addition of ISX9 exhibited only a small  
236 contribution to their down-regulation (**Suppl.Fig.3B**). Importantly, validation of many of those  
237 genes with RT-qPCR verified the observed trend and also indicated that ISX9 alone (sc-



238 miRNA+ISX9) failed to down-regulate their mRNA levels (**Suppl.Fig.3C**). In parallel, heat map  
239 analysis of up-regulated neuronal-specific TFs revealed that miR-124 led to the up-regulation  
240 of TFs related to telencephalon development such as *Tox*, *Foxo6*, *Scrt1*, *Scrt2*, *Rcor2*, *Rarb*,  
241 *Rxrg*, *Dlx5* and *Sox21* (**Fig.4D**), along with TFs that we had already identified through prior RT-  
242 qPCR analysis (*Mash1*, *Insm1*, *Hes6*, *Sox4*, *Fezf2*, *Gsx2*, *Dlx1*). Additionally, the  
243 supplementation with ISX9 increased the number of TFs implicated in telencephalon  
244 development, among which *Eomes* (*Tbr2*), *Prdm8*, *Ovol2*, *Tfap2c*, *Tshz2*, *Lhx6* and *Cux2*  
245 (**Fig.4D**). Surprisingly, we identified a rather large set of TFs highly up-regulated only following  
246 ISX9 addition, related to more ventral/caudal brain regions than the telencephalon, such as  
247 the retina, midbrain, hindbrain/spinal cord (**Fig.4D**), a finding posing the possibility that ISX9  
248 expands region-specific neuronal identity at least at the transcriptional level. Validation of  
249 selected TFs/EFs expressed either in telencephalon (**Suppl.Fig.3D**) or in midbrain  
250 (**Suppl.Fig.3E**) and hindbrain/spinal cord (**Suppl.Fig.3F**) by RT-qPCR verified their observed up-  
251 regulation by the addition of ISX9.

252 Interestingly, heat map analysis of differentially expressed RNA-binding proteins (RBPs)  
253 revealed that miR-124 was sufficient to down-regulate many RBPs expressed in astrocytes and  
254 other non-neuronal cells, such as the splicing factors *Ptbp1*, *Snrpa1*, *Lgals3*, *Isy1*, *Ddx39* and  
255 *Syf2*, as well as the mRNA decay proteins *Zfp36*, *Zfp36l1*, *Zfp36l2* (**Fig.4E**). In addition, miR-124  
256 moderately up-regulated several neuronal specific RBPs, mostly relevant to mRNA splicing and  
257 stabilization, among which *Elavl2*, *Elavl4*, *Nova1*, *Rbfox1*, *Rbfox2*, *Celf3*, *Nol3*, *Nol4* and  
258 *Adarb1*, while the addition of ISX9 induced further up-regulation of their mRNA levels and  
259 significantly increased the number of genes implicated in neuron specific splicing, editing or  
260 translation such as *Aplp1*, *Celf4*, *Celf5*, *Celf6*, *Elavl3*, *Ern2*, *Esrp2*, *Rbfox3*, *Rbm11*, *Ssrm4* and  
261 *Tdrd6* (**Fig.4E**).

262 The analysis of differentially expressed EFs revealed that miR-124 increased on its own the  
263 levels of several EFs related to epigenetic transcriptional activation, including the H3K4  
264 methyltransferase *Kmt2c*, the DNA demethylase *Tet1*, the chromatin remodeling factors  
265 *Smarca1*, *Smarca2*, *Chd7*, as well as the neuronal BAF (nBAF) complex component *Ss18l1*  
266 (*Crest*) (**Suppl.Fig.4G**). On the other hand ISX9 further contributed in up-regulating the brain  
267 specific chromatin remodeling factor *Chd5*, the nBAF complex components *Actl6b* and *Dpf3*  
268 and the H3K4 methyltransferase *Smyd3*, while interestingly it majorly contributed in down-  
269 regulating EFs related to epigenetic transcriptional repression, such as the H3K9  
270 methyltransferases *Suv39h1* and *Suv39h2*, the histone deacetylases *Hdac5* and *Hdac7*, the

271 components of repressor complexes *Cbx5*, *Sap18* and *Rbbp4*, and the component of non-  
272 neuronal BAF complexes *Dpf2* (**Suppl.Fig.4G**).

273 The above observations led us to the conclusion that miR-124 over-expression is sufficient to  
274 induce the astrocytic reprogramming switch towards an immature cortical neuronal fate  
275 through down-regulation of many glial specific genes, many of which are implicated in  
276 different regulatory levels, such as the transcriptional, post-transcriptional, epigenetic and  
277 signaling pathway level. The addition of ISX9, on the other hand, acts auxiliary to miR-124  
278 reprogramming action enhancing neuronal-specific gene transcription contributing to the  
279 maturation of miR-124 immature-iNs.

### 280 **The non-neuronal RBP *Zfp36l1* is a novel direct target of miR-124**

281 To get a closer insight into the post-transcriptional effects of miR-124 on the astrocytic  
282 transcriptome, we sought to determine the direct targets of miR-124 that could act as drivers  
283 of the reprogramming switch. Argonaute (AGO) HITS-CLIP experiments are considered the  
284 avant-garde of high-throughput methodologies for the direct detection of miRNA targets on  
285 a transcriptome-wide scale. Therefore, we utilized publicly available AGO-HITS-CLIP data,  
286 performed in mouse brain cortex (Chi et al. 2009) in order to detect miR-124 binding sites.  
287 The analysis revealed 171 miR-124 direct targets that were also defined as down-regulated in  
288 the miR-124-iNs vs sc-miRNA astro RNA-Seq analysis ( $\log_2(\text{fold change}) \leq -1$ ,  $\text{FDR} < 0.01$ ). miR-  
289 124 targets were subsequently filtered to examine genes expressed in astrocytes, utilizing a  
290 published reference list for expressed transcripts in distinct cell types of the mouse brain (Y.  
291 Zhang et al. 2014), ending up with 130 miR-124 direct target genes (**Fig.5A**).

292 Among these genes, a prominent target was the RBP *Zfp36l1*, which is implicated in the mRNA  
293 decay (Lai et al. 2000) and is highly expressed in cortical glial cells (Weng et al. 2019), cortical  
294 radial glial precursors (Yuzwa et al. 2017; Weng et al. 2019) and other non-neuronal cells  
295 (Carrick and Blackshear 2007). miR-124 directly binds to the 3' UTR of *Zfp36l1* transcript with  
296 perfect seed complementarity (7mer-M8 site) (**Fig.5B**), while in re-analysis of publicly  
297 available AGO-HITS-CLIP data from human motor cortex and cingulate gyrus tissues, the miR-  
298 124 binding site on the 3' UTR of *ZFP36L1* human transcript was found to be conserved  
299 (**Fig.5B**).

300 The efficient down-regulation of *Zfp36l1* by miR-124 was validated by RT-qPCR, where it was  
301 shown to be a very early event in the course of reprogramming, with a greater than 50%  
302 reduction of the control *Zfp36l1* mRNA levels only 24h after the first transfection (day2)  
303 (**Suppl.Fig.4A**). Interestingly, ISX9 alone was not potent to down-regulate *Zfp36l1* mRNA levels

304 **(Fig.5C)**, further supporting our initial hypothesis that ISX9 alone cannot instruct  
305 reprogramming of astrocytes to iNs, possibly by failing to down-regulate astrocytic fate genes.

306 Since Zfp36l1 acts by mediating degradation of its mRNA targets, we were interested in  
307 identifying Zfp36l1 mRNA targets, being up-regulated in our analysis. For this purpose, we  
308 combined two publicly available Zfp36l1 individual-nucleotide resolution CLIP-Seq data (iCLIP-  
309 Seq) from thymocytes (Vogel et al. 2016) and B lymphocytes (Galloway et al. 2016) and ended  
310 up with 621 Zfp36l1 direct targets that are up-regulated in miR-124-iNs vs sc-miRNA astro  
311 ( $\log_2(\text{fold change}) \geq 1$ ,  $\text{FDR} < 0.05$ ), which importantly correspond to 47% of miR-124 up-  
312 regulated DEGs. GO enrichment analysis revealed that many of these genes are implicated in  
313 neurogenesis, neuron projection development, synaptic transmission, axonogenesis,  
314 dendritic morphogenesis and telencephalon development **(Fig.5D)**. Interestingly, many of  
315 them were also found to regulate transcription and RNA processing **(Fig.5D)**, highlighting an  
316 important regulatory role for many Zfp36l1 targets, which could possibly have great impact  
317 on the reprogramming process. Among these targets we found neurogenic TFs, such as *Tox*,  
318 *Tox3*, *Rcor2*, *Cux1*, *Hes6*, *Lzts1* and *Mllt11* as well as EFs also related to neurogenesis such as  
319 *Chd3*, *Chd7*, *Kmt2c* and *Tet1* **(Fig.5E)**. Notably, we also identified as Zfp36l1 direct targets the  
320 neuronal RBPs *Elavl4*, *Nova1* and *Rbfox1* **(Fig.5E)**. This constitutes a significant finding that  
321 delineates the neuronal RBPs' repression directly by Zfp36l1, being relieved upon miR-124-  
322 mediated Zfp36l1 down-regulation.

323 We subsequently examined the mRNA levels of the Zfp36l1 targets, *Elavl4*, *Nova1*, *Rbfox1*,  
324 *Rcor2* and *Tox* upon miR-124 overexpression with RT-qPCR and verified that miR-124 was  
325 potent to induce their up-regulation **(Fig.5F)**. We also verified the increase of the protein  
326 levels of the neurogenic TF and target of Zfp36l1, *Tox*, in miR-124-iNs at day5 by  
327 immunofluorescence analysis **(Suppl.Fig.4B, C)**.

328 Notably, we observed that the combination of miR-124 with ISX9 greatly further enhanced  
329 the mRNA levels of the RBP targets of Zfp36l1, *Elavl4* and *Rbfox1* **(Suppl.Fig.4D)**, as well as the  
330 other neuronal RBPs of the nElavl family, *Elavl2* **(Suppl.Fig.4E)** and *Elavl3* **(Suppl.Fig.4F)**,  
331 highlighting the importance of ISX9 in reinforcing the mRNA levels of significant neuronal  
332 specific RBPs during the course of reprogramming.

333 Collectively, these data show that the targeting of Zfp36l1 by miR-124 de-represses the  
334 Zfp36l1 neurogenic interactome, which corresponds to half of the miR-124-up-regulated  
335 genes and includes neuronal-specific genes with important regulatory functions. Thus the

336 miR-124/Zfp361l interaction bears the potential to play a key regulatory role in the control of  
337 the neurogenic reprogramming switch of astrocytes by miR-124.

338 **Targeting of Zfp361l by miR-124 plays a key role in the miR-124-induced cell fate switch of**  
339 **astrocytes to iNs**

340 To investigate the impact of the miR-124/Zfp361l interaction on the miR-124-mediated  
341 reprogramming of astrocytes, we used a target site blocker (TSB) oligonucleotide, which  
342 competitively binds to the miR-124 binding site on the 3'UTR of Zfp361l mRNA and blocks its  
343 down-regulation by the miR-124-RISC complex (**Fig.6A**). We verified the inhibition of the miR-  
344 124-induced down-regulation of Zfp361l protein levels by the addition of TSB in a dose  
345 dependent manner (miR-124:TSB molecular ratio 4:1, 2:1) at day5 of the reprogramming  
346 protocol by western blot (**Fig.6B**). Next, we tested the effect of TSB on the mRNA levels of the  
347 neuronal targets of Zfp361l, *Tox*, *Rbfox1*, *Nova1*, *Rcor2* and *Elavl4* by RT-qPCR initially at day3  
348 and observed a dose-dependent reduction of the miR-124-induced up-regulation of *Tox*,  
349 *Rbfox1*, *Nova1* and *Rcor2*, but not of *Elavl4*, in the presence of increasing concentrations of  
350 TSB (miR-124:TSB molecular ratio 4:1, 2:1 and 1:1) (**Fig.6C**). The mRNA levels of *Tox* and *Rbfox1*  
351 retained the same response to TSB at a later time point, at day5 (**Suppl.Fig.5A, B**), an effect  
352 that was not observed for the other Zfp361l targets *Nova1*, *Rcor2* and *Elavl4* (**Suppl.Fig.5C**),  
353 implying that their post-transcriptional regulation becomes more complex as the neuronal  
354 conversion is gradually established. Importantly, TSB resulted in a statistically significant and  
355 dose-dependent reduction in the percentage of Tuj1+ miR-124-iNs at day5 (**Fig.6D, E**), which  
356 was accompanied by an evident alteration of their characteristic iN morphology (**Fig.6D, F**).  
357 More specifically, a morphological analysis of the number of processes extending from the  
358 soma and the size of the soma of Tuj1+ cells indicated that TSB addition resulted in gradual  
359 abolishment of their multipolar neuronal morphology with fine processes, characteristic of  
360 miR-124-iNs (**Fig.6D left panel, F**), and instead largely led to the retention of a premature  
361 astrocyte-like morphology with bigger soma (**Suppl.Fig.5D**) and none or very few processes  
362 (**Fig.6D right panel, F**).

363 These observations strongly indicate that the targeting of Zfp361l by miR-124 plays a crucial  
364 role in the miR-124-induced neuronal reprogramming action by unlocking neurogenic genes  
365 with important regulatory activity and by controlling the necessary morphological changes.

366

367

368 **miR-124 induces reprogramming of resident reactive astrocytes to iNs with deep-layer**  
369 **cortical identity *in vivo* following cortical trauma**

370 To evaluate the *in vivo* reprogramming potential of miR-124 to drive cell fate conversion of  
371 resident reactive cortical astrocytes to iNs alone or supplemented by ISX9, we overexpressed  
372 miR-124 via lentiviral transfer into the mechanically injured cortex of 3-4 months old mice. To  
373 this end we stereotaxically injected either one of the two lentiviruses, control LV-GFP and LV-  
374 miR-124-GFP, in order to transduce reactive astrocytes surrounding the cortical injury site,  
375 while ISX9 was systemically administered beginning 2 days after viral injection for 5  
376 consecutive days in a group of mice (**Fig.7A**). We initially sacrificed a group of mice 6 days after  
377 viral administration (10 days after cortical trauma induction) to evaluate the original  
378 phenotype of transduced cells surrounding the injury site (**Suppl.Fig.6A**) and observed that  
379 the majority of them (approximately 68%) in both conditions were GFAP+ reactive astrocytes,  
380 while an average of 10% were NeuN+ neurons. The rest of the transduced cells were equally  
381 either Iba-1+ microglial cells or Olig2+ oligodendrocytes (**Suppl.Fig.6B**). For all markers  
382 examined at this time point, there were no statistically significant differences between LV-  
383 124-GFP and control LV-GFP, indicating that the two viruses are expected to transduce the  
384 same percentage of astrocytes and neurons upon injection into the cortical parenchyma.  
385 Further analysis of the percentage of NeuN+/GFP+ transduced cells 3 weeks after the  
386 stereotaxic injection revealed that it was significantly increased in the animals that received  
387 the miR-124-overexpressing virus, but not the control virus (**Fig.7B, C**). In particular, while  
388 approximately 10% of the transduced cells were NeuN+ in LV-GFP-injected animals, showing  
389 no significant difference between the 6 days and 3 week time points, 74% of the LV-miR-124-  
390 GFP-transduced cells were NeuN+ 3 weeks after the injection, showing significant difference  
391 between the two time points, indicating a strong potential of miR-124 to direct conversion of  
392 reactive astrocytes into iNs *in vivo*. The same effect was observed when the injection of LV-  
393 miR-124-GFP virus was accompanied by systemic administration of ISX9, where 71% of  
394 transduced cells were found to be NeuN+, while no significant difference was observed at 3  
395 weeks after co-treatment of ISX9 in comparison to LV-miR-124-GFP injection alone (**Fig.7C**).

396 Overexpression of miR-124 either alone or along with ISX9 administration, appeared to drive  
397 iNs towards a deep layer cortical identity, as the vast majority of the NeuN+ transduced cells  
398 after 3 weeks in both groups were also positive for the deep layer cortical marker Tbr1, with  
399 percentages reaching 98% in LV-miR-124-iNs and 88% in LV-miR-124-GFP+ISX9-iNs, with no  
400 significant difference observed between the two groups (**Fig.7D, E**).

401 The above *in vivo* data indicate that miR-124 is sufficient to drive on its own neurogenic  
402 reprogramming of reactive astrocytes within the injured cortex micro-environment that  
403 render it a potent candidate molecule for further *in vivo* application.

404

## 405 Discussion

406 In this study we attempted to isolate miR-124 mechanism of action from that of other  
407 reprogramming co-factors and we provide evidence that miR-124 drives the trans-  
408 differentiation switch of cortical astrocytes to an immature iN phenotype of cortical identity,  
409 recapitulating its endogenous role in embryonic cortical development (Maiorano and  
410 Mallamaci 2009) and SVZ adult neurogenesis (Cheng et al. 2009; Åkerblom et al. 2012).  
411 Indeed, miR-124 directed astrocytes through a multipolar intermediate stage expressing TFs  
412 such as *Mash1*, *Tbr2*, *Insm1*, *Rcor2*, *Fezf2* and *Tbr1* all associated with neuronal commitment  
413 and differentiation during embryonic (Kwan, Šestan, and Anton 2012; Elsen et al. 2018) and  
414 adult neurogenesis (Díaz-Guerra et al. 2013). Intriguingly, miR-124 over-expression led to a  
415 significant down-regulation of the neuronal differentiation bHLH TF NeuroD1, which has been  
416 reported as a temporal, stage-specific event in early stages of eye development in *Xenopus*  
417 (Liu et al. 2011). To this end to reinforce the differentiation of immature miR-124-iNs, we  
418 supplemented miR-124 with the neurogenic compound ISX9, known to up-regulate neuronal  
419 specific genes, among which NeuroD1. ISX9 acts by increasing intracellular Ca<sup>2+</sup> signaling  
420 leading to HDAC5 nuclear exit and MEF2 de-repression (Schneider et al. 2008) and has been  
421 already used in chemical reprogramming protocols for the conversion of fibroblasts and  
422 astrocytes to iNs (Gao et al. 2017; Xiang Li et al. 2015). Additionally, ISX9 enhances the  
423 differentiation of iPSC-derived neurons from Huntington's disease patients, indicating that it  
424 also possesses a neuronal maturation-promoting activity (Lim et al. 2017). Indeed, the  
425 addition of ISX9 greatly improved both the reprogramming efficiency and differentiation  
426 status of miR-124+ISX9-iNs, by enhancing *Tbr2*, *Neurog2* and *NeuroD1* transcriptional levels  
427 reinforcing their passage through a *Tbr2*<sup>+</sup> intermediate stage and subsequently promoting  
428 their differentiation leading to the acquisition of electrophysiologically active iNs.  
429 Interestingly, despite a robust up-regulation of the levels of NeuroD1 and many other  
430 neuronal TFs by ISX9 alone, control sc-miRNA+ISX9-treated astrocytes failed to undergo  
431 reprogramming. NeuroD1 has been extensively reported to possess a strong 'pioneer factor'  
432 reprogramming capacity towards the neuronal fate upon its viral-mediated overexpression  
433 (Pataskar et al. 2016; Matsuda et al. 2019; Guo et al. 2014; Rivetti Di Val Cervo et al. 2017),  
434 however we hypothesize that very high levels of *NeuroD1* – not being triggered by ISX9  
435 supplementation in our system – are required to inflict these effects.

436 The RNA-Seq analysis we performed, highlighted the importance of miR-124 over-expression  
437 in the down-regulation of astrocytic TFs, RBPs, EFs and components of signaling pathways with  
438 significant regulatory role in astrocytic identity and function, which is in accordance with the

439 documented role of miR-124 in favoring neuronal fate at the expense of astrocytic (Neo et al.  
440 2014) and implies that astrocytic identity barriers need to be repressed before the induction  
441 of a neuronal cell fate during the reprogramming process. Conversely, ISX9 had a small  
442 contribution in the repression of astrocytic genes, thus this might be the reason for its inability  
443 to confer the reprogramming switch on its own.

444 Our analysis of the direct miR-124 targets utilizing AGO-HITS-CLIP data from mouse cortex (Chi  
445 et al. 2009) revealed the RBP *Zfp36l1* as a novel target of miR-124. Of note, we also verified  
446 the miR-124/*Zfp36l1* interaction in human bearing the same binding site, by analyzing AGO-  
447 HITS-CLIP data from human motor cortex and cingulate gyrus (Boudreau et al. 2014), a finding  
448 highlighting the importance of this conserved interaction during mammalian brain evolution.  
449 Many studies have identified several direct targets of miR-124 with important regulatory role  
450 in neurogenesis, acting at the transcriptional level, such as the TFs *Sox9* (Cheng et al. 2009),  
451 *Lhx2* (Sanuki et al. 2011) and the components of the REST repressor complex, *Scp1*  
452 (Visvanathan et al. 2007) and *Rcor1* (Baudet et al. 2012; Volvert et al. 2014); or at the  
453 epigenetic level, such as the component of the PRC2 complex *Ezh2* (Neo et al. 2014) and the  
454 component of the BAF complex BAF53a (Yoo et al. 2009); as well as at the post-transcriptional  
455 level, such as the RBP involved in alternative splicing *Ptbp1* (Makeyev et al. 2007).

456 Here, we report for the first time that miR-124 is directly implicated in the regulation of  
457 another process mediated by RBPs, the mRNA decay, apart from the well-characterized miR-  
458 124/*Ptbp1* circuitry (Makeyev et al. 2007; Yeom et al. 2018; Xue et al. 2013). *Zfp36l1* is a  
459 member of the *Zfp36* family of proteins along with *Zfp36* and *Zfp36l2*, which act by binding to  
460 AU rich elements (AREs) in the 3'UTR of their mRNA targets mediating their destabilization(Lai  
461 et al. 2000). *Zfp36l1* is expressed in cortical radial glial precursors of the VZ (Yuzwa et al. 2017;  
462 Weng et al. 2019; DeBoer et al. 2013), in cortical glial cells (Weng et al. 2019) and in non-  
463 neuronal cells (Carrick and Blackshear 2007; Chen et al. 2015). Interestingly, the ARE-  
464 dependent mRNA decay is regulated by other neurogenic miRNAs as well, since the close  
465 paralog of *Zfp36l1*, *Zfp36*, is targeted by miR-9 (Dai et al. 2015), suggesting a combined  
466 regulation of *Zfp36* family members by the two miRNAs to counteract the destabilization of  
467 neuronal mRNAs during neurogenesis.

468 In order to identify targets of *Zfp36l1* being up-regulated in our system we examined data  
469 from *Zfp36l1*-iCLIP-Seq experiments in thymocytes (Vogel et al. 2016) and B lymphocytes  
470 (Galloway et al. 2016). Although our analysis was restricted to a not relevant to the astrocytic  
471 transcriptome, we identified a rather large number of *Zfp36l1* targets being up-regulated in  
472 miR-124-iNs that interestingly correspond to nearly half of the up-regulated genes by miR-



473 124. Importantly, many Zfp36l1 targets exhibit significant regulatory role in neurogenesis and  
474 neuronal differentiation, such as the studied here TFs *Tox* and *Rcor2* and the RBPs *Rbfox1*,  
475 *Elavl4*, and *Nova1*. Further on, to experimentally validate our hypothesis that Zfp36l1 is a  
476 direct miR-124 target implicated in astrocytes' cell fate switch, we used a target site blocker  
477 (TSB) that efficiently antagonizes the binding of miR-124 in the 3'UTR of *Zfp36l1* mRNA and  
478 showed that the disruption of miR-124/Zfp36l1 interaction has a negative impact on the  
479 reprogramming process, reducing the number of Tuj1+ miR-124-iNs and abolishing their  
480 multipolar morphology. Of note, our experiments with the TSB blocker revealed that among  
481 the neuron-specific RBPs that are targets of Zfp36l1, *Rbfox1* and *Nova1* exhibit a pattern of  
482 direct post-transcriptional regulation by contrast to *Elavl4*, implying the stronger involvement  
483 of other RBPs in its post-transcriptional regulation. In accordance with this, Zfp36 has been  
484 reported to target *Elavl2*, *Elavl3*, *Elavl4* and *Nova1* (Dai et al. 2015), uncovering a  
485 complementary and synergistic role of Zfp36l1 and Zfp36 in repressing neuron-specific RBPs  
486 in non-neuronal cells.

487 Importantly, the here identified Zfp36l1 direct target, *Rbfox1*, has been reported to be a  
488 critical post-transcriptional regulator of gene expression during cortical development (J. A. Lee  
489 et al. 2016; Weyn-Vanhentenryck et al. 2014). To the same direction, we show here that  
490 Zfp36l1 also directly targets the TFs *Tox* and *Rcor2*, both known to be involved in the control  
491 of mammalian corticogenesis, with *Tox* regulating among others the levels of dorsal  
492 telencephalon TFs and marker of IPs *Tbr2* (Artegiani et al. 2015) and *Rcor2* being expressed  
493 along with *Insm1* in cortical IPs promoting dorsal telencephalon patterning (Wang et al. 2016;  
494 Elsen et al. 2018). Additionally, the repression of the multipolar morphology of miR-124-iNs  
495 by the TSB blocker could imply a role for the miR-124/Zfp36l1 interaction in the acquisition of  
496 a multipolar morphology characteristic of endogenous VZ/SVZ IPs (Mizutani et al., 2018), a fact  
497 corroborated by the GO analysis of Zfp36l1 target genes, which presented the GO terms  
498 neuronal projection development and dendrite morphogenesis with high statistical  
499 significance. Thus, this analysis revealed certain transcriptional and post-transcriptional  
500 cortical neurogenesis regulators being de-repressed by the miR124/Zfp36l1 interaction  
501 **(Fig.6G)**, strengthening the notion that miR-124-mediated reprogramming of astrocytes  
502 recapitulates molecular aspects of endogenous neurogenesis.

503 Furthermore, the addition of ISX9 significantly contributed to the up-regulation of the mRNA  
504 levels of the neuronal RBPs *Elavl2*, *Elavl3*, *Elavl4* (Ince-Dunn et al. 2012; Scheckel et al. 2016)  
505 and *Rbfox1* (Weyn-Vanhentenryck et al. 2014), reinforcing the action of miR-124 in inducing  
506 the switch from the neuronal transcripts' destabilizing RBPs to the stabilizing neuronal RBPs

507 **(Fig.6G)**. In parallel, ISX9 supplementation greatly enhanced the transcriptional levels and the  
508 number of TFs related to telencephalon development and/or adult neurogenesis, further  
509 promoting the cortical identity of iNs already initiated by miR-124. Surprisingly, ISX9 also up-  
510 regulated a large set of TFs related to the development of other non-telencephalic brain  
511 regions such as the midbrain and the hindbrain/spinal cord. However, the mechanism of the  
512 observed here ISX9-mediated up-regulation of ventral/caudal TFs still remains elusive. Of  
513 note, ISX9 has been shown to affect the epigenetic landscape leading to an open chromatin  
514 state by increasing H3/H4 acetylation in pancreatic  $\beta$ -cells (Dioum et al. 2011), suggesting that  
515 an epigenetic mechanism may be responsible for the observed transcriptional regional  
516 expansion, a hypothesis that needs to be further explored.

517 Here we also demonstrate that miR-124 is capable of directly converting reactive cortical  
518 astrocytes surrounding a mechanically-induced trauma to iNs of deep-layer cortical identity.  
519 Brain injury is known to facilitate *in vivo* reprogramming, rendering astrocytes more plastic by  
520 activating NSC genes' expression (Götz et al. 2015). *In vivo* reprogramming of reactive  
521 astrocytes to neuronal precursors and iNs has been achieved following forced expression of  
522 TFs among which Sox2 (Niu et al. 2013), Neurog2 (Grande et al. 2013), NeuroD1 (Guo et al.  
523 2014; Rivetti Di Val Cervo et al. 2017) and Nurr1/Neurog2 (Mattugini et al. 2019), in some  
524 cases combined with anti-apoptotic and/or anti-oxidant treatment to enhance survival  
525 (Gascón et al. 2016). However, it is the first time that miR-124 is shown to be sufficient to  
526 reprogram reactive astrocytes to NeuN+ iNs with a high efficiency of 74%. Unlike to the *in*  
527 *vitro* situation, co-administration of ISX9 didn't significantly further enhance miR-124-induced  
528 reprogramming efficiency *in vivo*, possibly reflecting the strong effect of the surrounding  
529 micro-environment in supporting miR-124-induced neuronal conversion. Indeed, pro-  
530 inflammatory cytokines like TNF, and growth factors such as EGF, FGF2 and SHH present in  
531 the injured cortex have been reported to facilitate the neurogenic conversion of astrocytes  
532 (Gabel et al. 2016; Grande et al. 2013; Sirko et al. 2013).

533 Interestingly, following either miR-124 or miR-124+ISX9 treatment all iNs possess a deep-layer  
534 cortical identity expressing Tbr1 protein. Taking into account the fact that the injury has been  
535 performed in a deep cortical area, this observation indicates that, besides the *in vitro* observed  
536 endogenous potency of reprogrammed iNs to up-regulate Tbr1 levels, region-specific  
537 neuronal identity barriers are imposed to newly produced iNs by the surrounding cortical  
538 microenvironment, in accordance with recent findings unravelling the existence of layer-  
539 driven neuronal identity during *in vivo* astrocytic reprogramming to iNs (Mattugini et al. 2019).

540 Taken together this study highlighted the strong potency of miR-124 to instruct the cell fate  
541 switch of astrocytes, post-transcriptionally triggering cortical neurogenesis pathways being  
542 unlocked by the direct targeting of *Zfp36l1*. Additionally, our *in vitro* results give mechanistic  
543 insight from a developmental perspective into the combined action of miR-124 and ISX9 in  
544 driving direct reprogramming of astrocytes to mature iNs. Importantly, our findings point to  
545 an even stronger *in vivo* reprogramming capacity of miR-124 than the one observed *in vitro*,  
546 opening the possibility for its use in therapeutic protocols with minimal support by other  
547 neurogenic or anti-inflammatory/anti-oxidant factors.

548

## 549 **Materials and Methods**

### 550 **Primary cultures of postnatal cortical astrocytes**

551 Primary postnatal astrocytic cultures from P3-P5 mice were prepared as previously described  
552 (Aravantinou-Fatorou et al. 2015). Briefly, the cerebral cortexes from 2-3 P3-P5 C57BL/6 mice  
553 were collected in ice cold HBSS (Invitrogen), the tissue was washed three times with HBSS and  
554 digested with 0.04% trypsin (Sigma) and 10 $\mu$ g/ml DNase (Sigma) for 5 min at 37°C. After  
555 digestion cells were mechanically dissociated, centrifuged for 5 min at 850 rpm (120 g), re-  
556 suspended in DMEM 4.5g/lt glucose (Invitrogen) containing 10% FBS (Invitrogen), 1%  
557 Penicillin/Streptomycin (Pen/Strep) (Sigma) and placed in a T75 flask pre-coated with poly-D-  
558 lysine (PDL) (Sigma). When culture reached confluence (usually after 7 days), the flask was  
559 shaken in a horizontal shaker at 200-250 rpm for 20h, in order to obtain a pure astrocytic  
560 culture, free from neurons, oligodendrocytes and microglia. The remaining cells were digested  
561 with 0.5% trypsin-EDTA (Invitrogen) for 5 min at 37°C, centrifuged at 850 rpm, re-suspended  
562 in fresh DMEM 4.5g/lt glucose 10% FBS, 1% Pen/Strep and divided in two new T75 flasks pre-  
563 coated with PDL. Half of the medium was changed every two days.

### 564 **In vitro reprogramming protocol**

565 For the reprogramming of astrocytes to induced-neurons, 40,000 astrocytes were seeded in  
566 10mm coverslips coated with 20 $\mu$ g/ml poly-L-ornithine (PLO) (Sigma) overnight and 5 $\mu$ g/ml  
567 laminin for 3 h at 37°C (Sigma). Once cells reached >90% confluence (usually after 1-2 days)  
568 they became transfected with 80nM miR-124-3p mimics or sc-miRNA mimics (negative  
569 control) (Thermo) using Lipofectamine 2000 (Invitrogen) according to manufacturer's  
570 instructions (day1). The next day the astrocytic medium (DMEM 4.5g/lt glucose, 10% FBS, 1%  
571 Pen/Strep) was replaced with the reprogramming medium: Neurobasal (Invitrogen)  
572 supplemented with 1X B-27 (Invitrogen), 1X GlutaMAX (Invitrogen), 20 $\mu$ M vitamin E (a-  
573 tocopherol) (Sigma) and 200mM ascorbic acid (Sigma). The same process of transfection was  
574 repeated twice at day3 and day5. Vitamin E was added to the medium until day4, while  
575 ascorbic acid was added throughout the reprogramming protocol. At day7 the reprogramming  
576 medium was changed to the neuronal differentiation medium: Neurobasal supplemented  
577 with 1X B-27, 1X GlutaMAX, 20ng/ml BDNF (R&D Systems), 0.5mM cAMP (Sigma) and 200mM  
578 ascorbic acid. In the miR-124+ISX9-reprogrammed cells, 10 $\mu$ M of ISX9 chemical compound  
579 (Tocris) were added from day2 to day10. All the mediums added to the reprogrammed cells  
580 were pre-conditioned for 24 h in a confluent astrocytic culture.

581

582 **RT-qPCR analysis**

583 For the RT-qPCR analysis experiments, total RNA was extracted using the Nucleospin miRNA  
584 kit (Macherey-Nagel) and 500-800ng of total RNA were used for cDNA synthesis with the  
585 Superscript II reverse transcriptase (Invitrogen) according to manufacturer's instructions.  
586 Quantitative real time PCR was performed using SYBR Select Master Mix (Applied Biosystems)  
587 and samples were run in the ViiA 7 Real-Time PCR System (Applied Biosystems). The primers  
588 used are listed in **Table 1**. Each sample was analyzed in triplicates, gene expression was  
589 calculated using the  $\Delta\Delta C_t$  method and all the results were normalized to  $\beta$ -actin expression.  
590 Relative expression was estimated setting the values of sc-miRNA transfected astrocytes to 1.  
591 All experiments were performed at least in triplicates.

592 **Immunocytochemistry**

593 Cells were washed once with PBS and then fixed with 4% paraformaldehyde for 20 min at  
594 room temperature. Afterwards, cells were washed three times with PBS and blocked with 5%  
595 normal donkey serum (NDS) (Merck-Millipore), 0.1% Triton X-100 in PBS for 1 h at room  
596 temperature. For nuclear staining, cells were permeabilized with 0.25% Triton X-100 in PBS  
597 for 10 min at room temperature and washed three times with PBS prior to blocking. Next, cells  
598 were incubated with primary antibodies, diluted in 1% NDS, 0.05% Triton X-100 in PBS  
599 overnight at 4°C. The next day, cells were washed three times with PBS and incubated with  
600 secondary antibodies diluted in 1% NDS, 0.05% Triton X-100 in PBS for 2h at room  
601 temperature. The nuclei of the cells were stained with ProLong Gold Antifade Reagent with  
602 DAPI (Cell Signalling). The following primary antibodies were used in this study: mouse anti-  
603 Tuj1 (Covance, 1:600), chicken anti-Tuj1 (Millipore, 1:1000), mouse anti-MAP2 (Millipore,  
604 1:200), rabbit anti-Synapsin1 (Abcam, 1:200), rat anti-Mash1 (R&D Systems, 1:100), rabbit  
605 anti-Tbr2 (Abcam, 1:200), rabbit anti-Gsx2 (Millipore, 1:400), rabbit anti-Tox (Atlas antibodies,  
606 1:200), mouse anti-vGlut1 (Millipore, 1:1000) and rabbit anti-GABA (Sigma, 1:10,000). The  
607 secondary antibodies used in this study were Alexa Fluor 546-, Alexa Fluor 488- and Alexa  
608 Fluor 647-conjugated secondary antibodies (Life Technologies). Images were acquired with a  
609 20x or 40x objective (1024x1024 pixels, 1 $\mu$ m Z-step) using a Leica TCS SP8 confocal microscope  
610 (LEICA Microsystems). For each experiment measurements from 20-25 fields per coverslip  
611 were obtained for each condition.

612

613

## 614 **Electrophysiology**

615 For whole-cell recordings iNs plated in PLO-laminin coated coverslips were used for  
616 electrophysiological experiments beginning at day15 up to day27 of the reprogramming  
617 protocol. The coverslips with the cells were placed onto a recording chamber and viewed using  
618 an Olympus CKX41 microscope with a 40x lens. The cells were bathed in a solution containing:  
619 140mM NaCl, 2.8mM KCl, 2mM CaCl<sub>2</sub>, 4mM MgCl<sub>2</sub>, 10mM Glucose, and 20mM HEPES. For  
620 whole-cell recordings we used a capillary glass with Filament (Sutter instrument) to fabricate  
621 low resistance recording pipettes (~5 MΩ) and filled with: 140mM KCl, 2mM CaCl<sub>2</sub>, 2mM  
622 MgCl<sub>2</sub>, 2mM Mg-ATP, 5mM EGTA and 10mM HEPES. Osmolarity and pH of all solutions were  
623 adjusted appropriately before experiments. Data were acquired at room temperature (22–  
624 24°C) using an EPC9 HEKA amplifier and an ITC-16 acquisition system with a patchmaster  
625 software (HEKA). Data analysis was carried out using OriginPro8. **Voltage protocols:** The  
626 membrane of the cells was held at a holding potential of -70 mV and step depolarizing pulses  
627 were applied. Depolarization steps were applied for 50 msec in 10 mV increments from -80  
628 mV to +50 mV with a sweep interval time of 1 sec and sweep duration of 500 ms. Each  
629 depolarizing pulse was proceeded by a hyperpolarizing step to -120 mV. **Current protocols:**  
630 Cells we held at their resting membrane potential (0pA) and depolarizing current steps from -  
631 20 pA to 200 pA from a holding current of 0pA were applied.

## 632 **RNA-Seq experiment and bioinformatic analysis**

633 For the RNA-Seq experiment, the following samples were prepared in 3 biological replicates:  
634 astrocytes (day1), sc-miRNA-transfected astrocytes (day7), miR-124-iNs (day7) and miR-  
635 124+ISX9-iNs (day7). Total RNA was extracted using the Nucleospin miRNA kit (Macherey-  
636 Nagel) according to manufacturer's instructions. Libraries were prepared with TruSeq RNA  
637 Library Prep Kit v2 (Illumina) and 75c single-end sequencing in an Illumina NextSeq 550  
638 sequencer. Raw libraries were quality checked and preprocessed using FastQC  
639 (<https://www.bioinformatics.babraham.ac.uk/projects/fastqc/>). Mapping of reads against  
640 the Mouse Transcriptome (v.GRCm38.rel79) and transcript abundance estimation on  
641 Transcripts Per Million (TPM) values was performed using kallisto (Bray et al. 2016). Analysis  
642 of differential expression, interpretation and visualization was subsequently performed using  
643 kallisto-compatible Sleuth tool (Pimentel et al. 2017) and R-base functions. Gene ontology  
644 (GO) enrichment analysis was performed using the Gene Ontology Panther Classification  
645 System (<http://pantherdb.org/>).

646

## 647 **Analysis of AGO-CLIP-Seq data**

648 AGO-HITS-CLIP datasets, performed in mouse brain cortex tissue (P13 neocortex, 5 replicates)  
649 and human brain tissues (motor cortex, cingulate gyrus) from 2 individuals, were retrieved  
650 from the publications (Chi et al. 2009) and (Boudreau et al. 2014) respectively. Raw libraries  
651 were quality checked using FastQC ([www.bioinformatics.babraham.ac.uk/projects/fastqc/](http://www.bioinformatics.babraham.ac.uk/projects/fastqc/)),  
652 while adapters/ contaminants were detected utilizing an in-house developed pipeline and the  
653 Kraken suite (Davis et al. 2013). Pre-processing was performed with TrimGalore (Krueger  
654 2015) and Cutadapt (Martin 2011). CLIP-Seq libraries were aligned against the reference  
655 genomes, i.e. GRCh38 and mm10 assemblies for human and mouse respectively, with  
656 GMAP/GSNAP (Wu and Nacu 2010) spliced aligner, allowing up to 2 mismatches. microCLIP  
657 CLIP-Seq-guided model (Paraskevopoulou et al. 2018) was utilized to identify binding events  
658 for the expressed miRNAs. In case of multiple replicates (i.e. mouse brain cortex) a miRNA  
659 binding event had to be present in at least two replicates to be considered as valid. Top  
660 expressed miRNAs were retrieved from the relevant publications. Human and mouse  
661 transcriptomes were compiled from ENSEMBL v96 (Cunningham et al. 2019) to annotate the  
662 retrieved miRNA binding events. Identified miRNA binding sites residing on 3' UTR regions  
663 were retained and subsequently filtered to preserve only genes expressed in astrocytes. A list  
664 of ~10,000 genes, expressed in astrocytes, with FPKM  $\geq 2$ , was retrieved from a reference  
665 publication and retained for analysis (Y. Zhang et al. 2014).

## 666 **Target Site Blocker (TSB) experiment**

667 For the functional validation of the miR-124/Zfp361l1 interaction a custom made miRCURY  
668 locked nucleic acid (LNA) miRNA Power Target Site Blocker (TSB) (Qiagen) was used with the  
669 following sequence: TTACAAGGCACTAAGTTGCTT. TSB was transfected in astrocytes along  
670 with sc-miRNA or miR-124-3p mimics using Lipofectamine 2000 (Invitrogen) in different  
671 molecular ratios: miR-124:TSB, 4:1 (80nM:20nM), 2:1 (80nM:40nM) and 1:1 (80nM:80nM).

## 672 **Western blot**

673 Cells were washed once with ice-cold PBS and lysed for 15 min in ice-cold lysis buffer (150mM  
674 NaCl, 50mM Tris (pH 7.5), 1%v/v Triton X-100, 1mM EDTA, 1mM EGTA, 0.1% SDS, 0.5% sodium  
675 deoxycholate) containing PhosSTOP phosphatase inhibitors and a complete protease inhibitor  
676 mixture (Roche Life Science), then centrifuged at 20,000 g for 15 min, followed by collection  
677 of the supernatant and measurement of the protein concentration by Bradford assay  
678 (Applichem). Proteins were separated by SDS-polyacrylamide gel electrophoresis (PAGE) and  
679 transferred onto nitrocellulose membranes (Maine Manufacturing). Nonspecific binding sites

680 were blocked in TBS/ 0.1% Tween 20/5% skimmed milk for 1 hour at 20°C followed by  
681 overnight incubation with primary antibodies diluted in TBS/0.1% Tween20/5% BSA. Primary  
682 antibodies used were rabbit anti-Zfp361l1 (Abcam, 1:500) and mouse anti- $\beta$ actin (Millipore,  
683 1:1000). Incubation with HRP-conjugated secondary antibodies, anti-mouse-HRP (Thermo,  
684 1:10,000) and anti-rabbit-HRP (Thermo, 1:5,000) was performed for 2 hours at room  
685 temperature and protein bands were visualized using the Clarity Western ECL Substrate (BIO-  
686 RAD).

### 687 **Lentiviral production**

688 For lentiviral in vivo transduction, VSV-G (Vesicular Stomatitis Virus–Glycoprotein)–  
689 pseudotyped lentiviruses were used either for the over-expression of miR-124 along with GFP  
690 or as control expressing only GFP. More specifically, for lentiviral particles' production, HEK  
691 293T cells cultured in 10-cm Petri dishes at a 50-60% confluence were co-transfected with 10  
692  $\mu$ g lentiviral plasmid expressing miR-124-1 precursor under the CMV promoter and GFP under  
693 the EF1 promoter (SBI System Biosciences) or 10  $\mu$ g lentiviral plasmid expressing GFP under  
694 the CMV promoter and the packaging plasmids pVSV-G (3.5  $\mu$ g), MDL (6.5  $\mu$ g), and RSV-REV  
695 (2.5  $\mu$ g) (all kindly provided by Dr. Matsas lab) with calcium phosphate. The following day the  
696 culture medium was replaced with fresh one, the supernatant containing the lentiviral  
697 particles was collected 48 h and 72 h (second harvest) after transfection and concentrated by  
698 ultracentrifugation at 25,000 rpm (80,000 x g) for 2 h at 4°C using a sucrose gradient.

### 699 **Cortical trauma, viral injection and ISX9 administration**

700 This study was carried out in strict compliance with the European Directive 2010/63/EU and  
701 the Greek National Law 161/91 for Use of Laboratory Animals, according to FELASA  
702 recommendations for euthanasia and the National Institutes of Health Guide for Care and Use  
703 of Laboratory Animals. All protocols were approved by the Animal Care and Use Committee  
704 of the Hellenic Pasteur Institute (Animal House Establishment Code: EL 25 BIO 013). License  
705 No 2585/29-5-18 for the experiments was issued by the Greek authorities of the Veterinary  
706 Department of the Athens Prefecture. The manuscript was prepared in compliance with the  
707 ARRIVE guidelines for reporting animal research.

708 Adult male and female FVB mice (8-16 weeks old) were deeply anaesthetized using inhalable  
709 isoflurane, and positioned in a stereotaxic apparatus. The dorsal surface of the skull was  
710 exposed through a midline incision and a burr hole was drilled at the following coordinates:  
711 antero-posterior (AP) -1.0 mm, caudal to Bregma; lateral (L) 1.0 mm to the midline (Franklin  
712 and Paxinos, 2001). A 26-gauge needle was inserted into the brain parenchyma in a depth of  
713 0.9 mm from the surface of the brain to create a trauma in the cortex, avoiding the corpus



714 callosum and hippocampus. The inserted needle was moved along the anterior-posterior axis  
715 between positions (AP) -1.1 and -0.9 to widen the trauma. The skin was sutured, a local  
716 analgesic cream containing 2.5% lidocain and 2.5% prilocain was applied and the animals were  
717 kept warm until they were fully awake. Viral injection took place 4 days after the cortical  
718 trauma. A 10 $\mu$ l Hamilton syringe (Hamilton) with a 26-gauge needle was slowly inserted into  
719 the brain tissue at coordinates (AP) -1.1 mm, (L) 1.0 mm, and (V): 1.0 mm, from the same burr  
720 hole on the skull and 2 $\mu$ l of lentiviral concentrate was injected at a rate of 0.5  $\mu$ l/min. The  
721 needle was left in position for 5 min after each injection and then withdrawn gently. A second  
722 viral injection was repeated at coordinates (AP) -0.9 mm, (L) 1.0 mm, and (V): 1.0 mm with  
723 similar procedures, and surgery was completed as described above. A group of animals was  
724 injected with the lentivirus LV-miR-124-GFP (group LV-124) and another one with the control  
725 lentivirus LV-GFP (group LV-GFP). A subgroup of the LV-124 group received intraperitoneally  
726 20 mg/kg of ISX9 (Tocris) diluted in (2-Hydroxypropyl)- $\beta$ -cyclodextrin (Sigma) (ISX9  
727 concentration: 2 mg/ml in 30% (2-Hydroxypropyl)- $\beta$ -cyclodextrin (Sigma) diluted in sterile  
728 ddH<sub>2</sub>O) once a day, for 5 consecutive days, beginning 48 h after lentiviral injection. Animals  
729 were sacrificed 6 days or 3 weeks after viral injection.

### 730 **Tissue Preparation, Histology, and Immunohistochemistry**

731 For histology, mice were deeply anaesthetized by inhaling isoflurane, and perfused with 4%  
732 paraformaldehyde (PFA) via left cardiac ventricle. The brains were removed, post-fixed in 4%  
733 PFA overnight, and then cryo-protected in 20% sucrose overnight. Tissues were then frozen  
734 in -20°C isopentane and cut into 20  $\mu$ m-thick coronal sections on a cryostat (Leica CM1900),  
735 collected on silane-coated slides and stored at -20°C. For detection of specific antigens with  
736 immunofluorescence, sections were left for 15 min in room temperature, washed in PBS, and  
737 blocked with 5% normal goat or donkey serum (Merck-Millipore) in PBT (0.1% Triton X-  
738 100/PBS) for 1 h. Incubation with primary antibodies took place overnight at 4°C. Primary  
739 antibodies to assess transduced cell identity used were: chicken polyclonal anti-GFP (Abcam,  
740 1:1000) to detect the transplanted cells, mouse monoclonal anti-neuronal nuclei (NeuN)  
741 (Merck-Millipore, 1:300) to identify mature neurons, rabbit polyclonal anti-glial fibrillary acidic  
742 protein (GFAP) (Dako,1:600) to detect astrocytes; rabbit polyclonal anti-oligodendrocyte  
743 transcription factor 2 (Olig2) (Merck-Millipore, 1:200) to detect oligodendrocytes, rabbit  
744 polyclonal anti-ionized calcium-binding adapter 1 (Iba-1) (Wako, 1:600) for detection of  
745 microglia and rabbit polyclonal anti-Tbr1 (Abcam,1:250) for detection of deep layer cortical  
746 neurons. Following incubation with primary antibodies, sections were washed with PBS and  
747 incubated for 2 h with the appropriate secondary antibodies conjugated with AlexaFluor 488

748 (green), 546 (red), or 647 (blue) and Hoechst (Molecular Probes) for nuclei staining. Finally,  
749 sections were washed and coverslipped with Mowiol (Calbiochem). Images were acquired  
750 with a 40x objective using Leica TCS SP8 and Leica TCS-SP5II confocal microscopes (LEICA  
751 Microsystems).

## 752 **Image analysis**

753 Images were analyzed using Fiji/ImageJ software (National Institutes of Health).

754 **In vitro analysis:** mean fluorescence intensity of Tbr2, Tox and Mash1 staining inside the cell  
755 nuclei was quantified using a custom-written macro implemented in Fiji. Initially automatic  
756 detection of nuclei was performed using the Otsu method and Tuj1+ cells were selected  
757 based on their mean intensity value above a user-defined threshold of 40, followed by a  
758 manual validation according to cell morphology (cells with an astrocyte-like morphology with  
759 a big, rectangular soma and none or few processes were excluded). Mean fluorescence  
760 intensity of Tbr2, Tox and Mash1 inside the cell nuclei ROIs was measured both for Tuj1- and  
761 Tuj1+ cells. Quantification was performed in maximum intensity projections. For each  
762 experiment measurements from at least 200-300 cells were obtained for each condition.

763 Morphological characterization of Tuj1+ cells in the TSB blocker experiments was also  
764 conducted using Fiji. More specifically, morphological characterization included quantification  
765 of the cell body area and the number of processes extending from the soma of Tuj1+ cells.  
766 Tuj1+ cells were selected based on the mean intensity value of their soma above a user-  
767 defined threshold and were sorted in 3 groups: cells with a multipolar morphology bearing 3  
768 or more processes extending from the soma, cells with 1-2 processes and cells exhibiting an  
769 astrocyte-like morphology with a rectangular soma possessing none or 1-2 processes.  
770 Quantification was performed in maximum intensity projections. For each experiment  
771 measurements from at least 100-150 cells were obtained for each condition.

772 **In vivo analysis:** for each animal and each immunofluorescence staining, cell counting was  
773 performed on brain sections collected at 240  $\mu$ m intervals across the whole antero-posterior  
774 extent of the hippocampus (bregma-0.5mm up to -2.5mm) in a total number of 3-4 mice for  
775 each experimental condition. For estimation of the ratio of transduced cells that have a  
776 specific phenotype, images of all GFP+ cells found in each set of sections were acquired and  
777 double-positivity with cell type-specific markers was evaluated by an observer "blind" to  
778 treatment group and time point. All GFP+ cells found in the cortex within these sections were  
779 imaged and analyzed. Representative confocal images shown in **Fig.7** and **Suppl.Fig.6** are  
780 obtained from coronal sections, antero-posterior positions between 21.3 and 22.2 relative to  
781 Bregma.

782 **Statistical analysis**

783 All in vitro quantified data are presented as average  $\pm$  SD, unless otherwise indicated. Two-  
784 tailed Student t-test was used to calculate statistical significance with p values for all the data  
785 obtained from the experiments with the TSB blocker, while for the rest of the data a one-  
786 tailed Student t-test was used. p values less than 0.05 ( $p < 0.05$ ) were considered indicative of  
787 significance. In vivo data were assessed using a one-way analysis of variance (ANOVA). When  
788 interactions were detected, group comparisons were performed using a two-sample assuming  
789 unequal variances test.

790 **Data Availability**

791 High throughput sequencing data are deposited in the European Nucleotide Archive under  
792 Study accession PRJEB38603.

793

## 794 **Acknowledgments**

795 This work was financially supported by: ‘BIOIMAGING-GR: A Greek Research Infrastructure for  
796 Visualizing and Monitoring Fundamental Biological Processes (MIS 5002755)’, funded by the  
797 Operational Program "Competitiveness, Entrepreneurship and Innovation" (NSRF 2014-2020),  
798 co-financed by Greece and the European Union (European Regional Development Fund);  
799 ARISTEIA-II ‘Astro-Rep’ 3713 Excellence Grant of the Greek Ministry of Education and  
800 Fondation Santé Grant 2017-2018, awarded to DT. We also acknowledge funding from the  
801 Stavros Niarchos Foundation (SFN) Grant to the Hellenic Pasteur Institute, as part of the  
802 Foundation's initiative to support the Greek Research Center ecosystem; Greek General  
803 Secretariat of Research and Technology ‘Action for the Study of Neurodegenerative Diseases  
804 on the Basis of Precision Medicine’ and ‘KRIPIS-II’ Action (MIS 5002486) under the Operational  
805 Strategic Reference Framework 2014–2020. We would like to thank Dr. Era Taoufik for critical  
806 comments on the manuscript.

## 807 **Author Contributions**

808 EP and DT conceived whole project, designed experiments and analyzed the data; EP, CG and  
809 MM conducted in vitro experiments; DCT and SJT designed and performed electrophysiology  
810 experiments; TK, DK and AGH designed and performed bioinformatics analysis and EP  
811 contributed in analyzing the data; PNK designed and performed in vivo experiments, analyzed  
812 relevant data and contributed in paper writing; IT contributed to in vivo experiments and  
813 relevant data analysis; EX developed the Fiji macro and helped with image analysis workflow;  
814 EP and DT wrote the manuscript; DT supervised the project and acquired funding.

## 815 **Conflict of Interest**

816 The authors report no conflict of interest.

817

## 818 References

- 819 Abernathy, Daniel G., Woo Kyung Kim, Matthew J. McCoy, Allison M. Lake, Rebecca Ouwenga, Seong  
820 Won Lee, Xiaoyun Xing, et al. 2017. "MicroRNAs Induce a Permissive Chromatin Environment  
821 That Enables Neuronal Subtype-Specific Reprogramming of Adult Human Fibroblasts." *Cell Stem*  
822 *Cell* 21 (3): 332-348.e9. <https://doi.org/10.1016/j.stem.2017.08.002>.
- 823 Acaz-Fonseca, Estefania, Ana Ortiz-Rodriguez, Iñigo Azcoitia, Luis M. Garcia-Segura, and Maria  
824 Angeles Arevalo. 2019. "Notch Signaling in Astrocytes Mediates Their Morphological Response  
825 to an Inflammatory Challenge." *Cell Death Discovery*. [https://doi.org/10.1038/s41420-019-  
826 \*0166-6\*.](https://doi.org/10.1038/s41420-019-0166-6)
- 827 Åkerblom, Malin, Rohit Sachdeva, Isabelle Barde, Sonia Verp, Bernhard Gentner, Didier Trono, and  
828 Johan Jakobsson. 2012. "MicroRNA-124 Is a Subventricular Zone Neuronal Fate Determinant." *Journal of Neuroscience*. <https://doi.org/10.1523/JNEUROSCI.0558-12.2012>.
- 829  
830 Ambasadhan, Rajesh, Maria Talantova, Ronald Coleman, Xu Yuan, Saiyong Zhu, Stuart A. Lipton, and  
831 Sheng Ding. 2011. "Direct Reprogramming of Adult Human Fibroblasts to Functional Neurons  
832 under Defined Conditions." *Cell Stem Cell*. <https://doi.org/10.1016/j.stem.2011.07.002>.
- 833 Aravantinou-Fatorou, Katerina, Felipe Ortega, Dafni Chroni-Tzartou, Nasia Antoniou, Cornelia  
834 Pouloupoulou, Panagiotis K. Politis, Benedikt Berninger, Rebecca Matsas, and Dimitra  
835 Thomaidou. 2015. "CEND1 and NEUROGENIN2 Reprogram Mouse Astrocytes and Embryonic  
836 Fibroblasts to Induced Neural Precursors and Differentiated Neurons." *Stem Cell Reports* 5 (3):  
837 405–18. <https://doi.org/10.1016/j.stemcr.2015.07.012>.
- 838 Artegiani, Benedetta, Antonio M Jesus Domingues, Sara Bragado Alonso, Elisabeth Brandl, Simone  
839 Massalini, Andreas Dahl, and Federico Calegari. 2015. "Tox: A Multifunctional Transcription  
840 Factor and Novel Regulator of Mammalian Corticogenesis." *The EMBO Journal* 34 (7): 896–910.  
841 <https://doi.org/10.15252/embj.201490061>.
- 842 Baudet, Marie Laure, Krishna H. Zivraj, Cei Abreu-Goodger, Alistair Muldal, Javier Armisen, Cherie  
843 Blenkinsop, Leonard D. Goldstein, Eric A. Miska, and Christine E. Holt. 2012. "MiR-124 Acts  
844 through CoREST to Control Onset of Sema3A Sensitivity in Navigating Retinal Growth Cones." *Nature Neuroscience*. <https://doi.org/10.1038/nn.2979>.
- 845  
846 Berninger, Benedikt, Marcos R. Costa, Ursula Koch, Timm Schroeder, Bernd Sutor, Benedikt Grothe,  
847 and Magdalena Götz. 2007. "Functional Properties of Neurons Derived from in Vitro  
848 Reprogrammed Postnatal Astroglia." *Journal of Neuroscience*.  
849 <https://doi.org/10.1523/JNEUROSCI.1615-07.2007>.
- 850 Birtele, Marcella, Yogita Sharma, Srisaiyini Kidnapillai, Shong Lau, Thomas B. Stoker, Roger A. Barker,  
851 Daniella Rylander Ottosson, Janelle Drouin-Ouellet, and Malin Parmar. 2019. "Dual Modulation  
852 of Neuron-Specific MicroRNAs and the REST Complex Promotes Functional Maturation of  
853 Human Adult Induced Neurons." *FEBS Letters*. <https://doi.org/10.1002/1873-3468.13612>.
- 854 Boudreau, Ryan L., Peng Jiang, Brian L. Gilmore, Ryan M. Spengler, Rebecca Tirabassi, Jay A. Nelson,  
855 Christopher A. Ross, Yi Xing, and Beverly L. Davidson. 2014. "Transcriptome-Wide Discovery of  
856 MicroRNA Binding Sites in Human Brain." *Neuron*.  
857 <https://doi.org/10.1016/j.neuron.2013.10.062>.
- 858 Bray, Nicolas L., Harold Pimentel, Páll Melsted, and Lior Pachter. 2016. "Near-Optimal Probabilistic  
859 RNA-Seq Quantification." *Nature Biotechnology*. <https://doi.org/10.1038/nbt.3519>.
- 860 Carrick, Danielle M., and Perry J. Blackshear. 2007. "Comparative Expression of Tristetraprolin (TTP)  
861 Family Member Transcripts in Normal Human Tissues and Cancer Cell Lines." *Archives of*  
862 *Biochemistry and Biophysics*. <https://doi.org/10.1016/j.abb.2007.04.011>.
- 863 Chen, Ming Tai, Lei Dong, Xin Hua Zhang, Xiao Lin Yin, Hong Mei Ning, Chao Shen, Rui Su, et al. 2015.  
864 "ZFP36L1 Promotes Monocyte/Macrophage Differentiation by Repressing CDK6." *Scientific*  
865 *Reports*. <https://doi.org/10.1038/srep16229>.
- 866 Cheng, Li Chun, Erika Pastrana, Masoud Tavazoie, and Fiona Doetsch. 2009. "MiR-124 Regulates Adult  
867 Neurogenesis in the Subventricular Zone Stem Cell Niche." *Nature Neuroscience*.  
868 <https://doi.org/10.1038/nn.2294>.
- 869 Chi, Sung Wook, Julie B. Zang, Aldo Mele, and Robert B. Darnell. 2009. "Argonaute HITS-CLIP Decodes  
870 MicroRNA-MRNA Interaction Maps." *Nature*. <https://doi.org/10.1038/nature08170>.
- 871 Cunningham, Fiona, Premanand Achuthan, Wasiu Akanni, James Allen, M. Ridwan Amode, Irina M.  
872 Armean, Ruth Bennett, et al. 2019. "Ensembl 2019." *Nucleic Acids Research*.

- 873 <https://doi.org/10.1093/nar/gky1113>.
- 874 Dai, Weijun, Wencheng Li, Mainul Hoque, Zhuyun Li, Bin Tian, and Eugene V. Makeyev. 2015. "A Post-  
875 Transcriptional Mechanism Pacing Expression of Neural Genes with Precursor Cell  
876 Differentiation Status." *Nature Communications*. <https://doi.org/10.1038/ncomms8576>.
- 877 Davis, Matthew P.A., Stijn van Dongen, Cei Abreu-Goodger, Nenad Bartonicek, and Anton J. Enright.  
878 2013. "Kraken: A Set of Tools for Quality Control and Analysis of High-Throughput Sequence  
879 Data." *Methods*. <https://doi.org/10.1016/j.ymeth.2013.06.027>.
- 880 DeBoer, E. M., M. L. Kraushar, R. P. Hart, and M. R. Rasin. 2013. "Post-Transcriptional Regulatory  
881 Elements and Spatiotemporal Specification of Neocortical Stem Cells and Projection Neurons."  
882 *Neuroscience*. <https://doi.org/10.1016/j.neuroscience.2013.05.042>.
- 883 Deo, Monika, Jenn Yah Yu, Kwan Ho Chung, Melissa Tippens, and David L. Turner. 2006. "Detection of  
884 Mammalian MicroRNA Expression by in Situ Hybridization with RNA Oligonucleotides."  
885 *Developmental Dynamics*. <https://doi.org/10.1002/dvdy.20847>.
- 886 Díaz-Guerra, Eva, Jaime Pignatelli, Vanesa Nieto-Estévez, and Carlos Vicario-Abejón. 2013.  
887 "Transcriptional Regulation of Olfactory Bulb Neurogenesis." *Anatomical Record*.  
888 <https://doi.org/10.1002/ar.22733>.
- 889 Dioum, Elhadji M., Jihan K. Osborne, Sean Goetsch, Jamie Russell, Jay W. Schneider, and Melanie H.  
890 Cobb. 2011. "A Small Molecule Differentiation Inducer Increases Insulin Production by  
891 Pancreatic  $\beta$  Cells." *Proceedings of the National Academy of Sciences of the United States of*  
892 *America*. <https://doi.org/10.1073/pnas.1118526109>.
- 893 Elsen, Gina E., Francesco Bedogni, Rebecca D. Hodge, Theo K. Bammler, James W. MacDonald, Susan  
894 Lindtner, John L.R. Rubenstein, and Robert F. Hevner. 2018. "The Epigenetic Factor Landscape of  
895 Developing Neocortex Is Regulated by Transcription Factors Pax6 $\rightarrow$  Tbr2 $\rightarrow$  Tbr1." *Frontiers in*  
896 *Neuroscience*. <https://doi.org/10.3389/fnins.2018.00571>.
- 897 Gabel, Sebastien, Eric Koncina, Gauthier Dorban, Tony Heurtaux, Cindy Birck, Enrico Glaab, Alessandro  
898 Michelucci, Paul Heuschling, and Luc Grandbarbe. 2016. "Inflammation Promotes a Conversion  
899 of Astrocytes into Neural Progenitor Cells via NF-KB Activation." *Molecular Neurobiology*.  
900 <https://doi.org/10.1007/s12035-015-9428-3>.
- 901 Galloway, Alison, Alexander Saveliev, Sebastian Łukasiak, Daniel J. Hodson, Daniel Bolland, Kathryn  
902 Balmanno, Helena Ahlfors, et al. 2016. "RNA-Binding Proteins ZFP36L1 and ZFP36L2 Promote  
903 Cell Quiescence." *Science*. <https://doi.org/10.1126/science.aad5978>.
- 904 Gao, Longfei, Wuqiang Guan, Min Wang, Huihan Wang, Jiali Yu, Qing Liu, Binlong Qiu, et al. 2017.  
905 "Direct Generation of Human Neuronal Cells from Adult Astrocytes by Small Molecules." *Stem*  
906 *Cell Reports*. <https://doi.org/10.1016/j.stemcr.2017.01.014>.
- 907 Gascón, Sergio, Elisa Murenu, Giacomo Masserdotti, Felipe Ortega, Gianluca L. Russo, David Petrik,  
908 Aditi Deshpande, et al. 2016. "Identification and Successful Negotiation of a Metabolic  
909 Checkpoint in Direct Neuronal Reprogramming." *Cell Stem Cell* 18 (3): 396–409.  
910 <https://doi.org/10.1016/j.stem.2015.12.003>.
- 911 Götz, Magdalena, Svetlana Sirko, Johannes Beckers, and Martin Irmeler. 2015. "Reactive Astrocytes as  
912 Neural Stem or Progenitor Cells: In Vivo Lineage, In Vitro Potential, and Genome-Wide  
913 Expression Analysis." *GLIA*. <https://doi.org/10.1002/glia.22850>.
- 914 Grande, Andrew, Kyoko Sumiyoshi, Alejandro López-Juárez, Jennifer Howard, Bhuvaneshwari Sakthivel,  
915 Bruce Aronow, Kenneth Campbell, and Masato Nakafuku. 2013. "Environmental Impact on  
916 Direct Neuronal Reprogramming in Vivo in the Adult Brain." *Nature Communications* 4.  
917 <https://doi.org/10.1038/ncomms3373>.
- 918 Gross, Robert E., Mark F. Mehler, Peter C. Mabie, Ziyang Zang, Linda Santschi, and John A. Kessler.  
919 1996. "Bone Morphogenetic Proteins Promote Astroglial Lineage Commitment by Mammalian  
920 Subventricular Zone Progenitor Cells." *Neuron*. [https://doi.org/10.1016/S0896-6273\(00\)80193-](https://doi.org/10.1016/S0896-6273(00)80193-2)  
921 [2](https://doi.org/10.1016/S0896-6273(00)80193-2).
- 922 Guo, Ziyuan, Lei Zhang, Zheng Wu, Yuchen Chen, Fan Wang, and Gong Chen. 2014. "In Vivo Direct  
923 Reprogramming of Reactive Glial Cells into Functional Neurons after Brain Injury and in an  
924 Alzheimer's Disease Model." *Cell Stem Cell* 14 (2): 188–202.  
925 <https://doi.org/10.1016/j.stem.2013.12.001>.
- 926 Heinrich, Christophe, Robert Blum, Sergio Gascón, Giacomo Masserdotti, Pratibha Tripathi, Rodrigo  
927 Sánchez, Steffen Tiedt, Timm Schroeder, Magdalena Götz, and Benedikt Berninger. 2010.  
928 "Directing Astroglia from the Cerebral Cortex into Subtype Specific Functional Neurons." *PLoS*  
929 *Biology*. <https://doi.org/10.1371/journal.pbio.1000373>.

- 930 Ince-Dunn, Gulayse, Hirotaka J. Okano, Kirk B. Jensen, Woong Yang Park, Ru Zhong, Jernej Ule, Aldo  
931 Mele, et al. 2012. "Neuronal Elav-like (Hu) Proteins Regulate RNA Splicing and Abundance to  
932 Control Glutamate Levels and Neuronal Excitability." *Neuron*.  
933 <https://doi.org/10.1016/j.neuron.2012.07.009>.
- 934 Jiang, Houbo, Zhimin Xu, Ping Zhong, Yong Ren, Gaoyang Liang, Haley A. Schilling, Zihua Hu, et al.  
935 2015. "Cell Cycle and P53 Gate the Direct Conversion of Human Fibroblasts to Dopaminergic  
936 Neurons." *Nature Communications*. <https://doi.org/10.1038/ncomms10100>.
- 937 Kang, Wenfei, and Jean M. Hébert. 2011. "Signaling Pathways in Reactive Astrocytes, a Genetic  
938 Perspective." *Molecular Neurobiology*. <https://doi.org/10.1007/s12035-011-8163-7>.
- 939 Krueger, Felix. 2015. "Trim Galore!: A Wrapper Tool around Cutadapt and FastQC to Consistently  
940 Apply Quality and Adapter Trimming to FastQ Files." *Babraham Institute*.
- 941 Kwan, Kenneth Y., Nenad Šestan, and E. S. Anton. 2012. "Transcriptional Co-Regulation of Neuronal  
942 Migration and Laminar Identity in the Neocortex." *Development*.  
943 <https://doi.org/10.1242/dev.069963>.
- 944 Lai, Wi S., Ester Carballo, Judith M. Thorn, Elizabeth A. Kennington, and Perry J. Blackshear. 2000.  
945 "Interactions of CCCH Zinc Finger Proteins with mRNA. Binding of Tristetraprolin-Related Zinc  
946 Finger Proteins to AU-Rich Elements and Destabilization of mRNA." *Journal of Biological  
947 Chemistry*. <https://doi.org/10.1074/jbc.M001696200>.
- 948 Lee, Ji Ann, Andrey Damianov, Chia Ho Lin, Mariana Fontes, Neelroop N. Parikshak, Erik S. Anderson,  
949 Daniel H. Geschwind, Douglas L. Black, and Kelsey C. Martin. 2016. "Cytoplasmic Rbfox1  
950 Regulates the Expression of Synaptic and Autism-Related Genes." *Neuron*.  
951 <https://doi.org/10.1016/j.neuron.2015.11.025>.
- 952 Lee, Seong Won, Young Mi Oh, Ya Lin Lu, Woo Kyung Kim, and Andrew S. Yoo. 2018. "MicroRNAs  
953 Overcome Cell Fate Barrier by Reducing EZH2-Controlled REST Stability during Neuronal  
954 Conversion of Human Adult Fibroblasts." *Developmental Cell*.  
955 <https://doi.org/10.1016/j.devcel.2018.06.007>.
- 956 Li, Xiang, Xiaohan Zuo, Junzhan Jing, Yantao Ma, Jinlin Jiaming Wang, Defang Liu, Jialiang Zhu, et al.  
957 2015. "Small-Molecule-Driven Direct Reprogramming of Mouse Fibroblasts into Functional  
958 Neurons." *Cell Stem Cell* 17 (2): 195–203. <https://doi.org/10.1016/j.stem.2015.06.003>.
- 959 Li, Xuekun, and Peng Jin. 2010. "Roles of Small Regulatory RNAs in Determining Neuronal Identity." *Nature Reviews Neuroscience*. <https://doi.org/10.1038/nrn2739>.
- 960 Lim, Ryan G., Lisa L. Salazar, Daniel K. Wilton, Alvin R. King, Jennifer T. Stocksdales, Delaram Sharifabad,  
961 Alice L. Lau, et al. 2017. "Developmental Alterations in Huntington's Disease Neural Cells and  
962 Pharmacological Rescue in Cells and Mice." *Nature Neuroscience* 20 (5): 648–60.  
963 <https://doi.org/10.1038/nn.4532>.
- 964 Liu, Kaili, Ying Liu, Weichuan Mo, Rong Qiu, Xiumei Wang, Jane Y. Wu, and Rongqiao He. 2011. "MiR-  
965 124 Regulates Early Neurogenesis in the Optic Vesicle and Forebrain, Targeting NeuroD1." *Nucleic Acids Research*. <https://doi.org/10.1093/nar/gkq904>.
- 966 Luján, R., R. Shigemoto, and G. López-Bendito. 2005. "Glutamate and GABA Receptor Signalling in the  
967 Developing Brain." *Neuroscience*. <https://doi.org/10.1016/j.neuroscience.2004.09.042>.
- 968 Magnusson, Jens P., Christian Göritz, Jemal Tatarishvili, David O. Dias, Emma M.K. Smith, Olle Lindvall,  
969 Zaal Kokaia, and Jonas Frisén. 2014. "A Latent Neurogenic Program in Astrocytes Regulated by  
970 Notch Signaling in the Mouse." *Science*. <https://doi.org/10.1126/science.1246206>.
- 971 Maiorano, Nicola Antonio, and Antonello Mallamaci. 2009. "Promotion of Embryonic Cortico-Cerebral  
972 Neuronogenesis by MiR-124." *Neural Development*. <https://doi.org/10.1186/1749-8104-4-40>.
- 973 Makeyev, Eugene V., Jiangwen Zhang, Monica A. Carrasco, and Tom Maniatis. 2007. "The MicroRNA  
974 MiR-124 Promotes Neuronal Differentiation by Triggering Brain-Specific Alternative Pre-mRNA  
975 Splicing." *Molecular Cell*. <https://doi.org/10.1016/j.molcel.2007.07.015>.
- 976 Martin, Marcel. 2011. "Cutadapt Removes Adapter Sequences from High-Throughput Sequencing  
977 Reads." *EMBnet.Journal*. <https://doi.org/10.14806/ej.17.1.200>.
- 978 Matsuda, Taito, Takashi Irie, Shutaro Katsurabayashi, Yoshinori Hayashi, Tatsuya Nagai, Nobuhiko  
979 Hamazaki, Aliya Mari D. Adefuin, et al. 2019. "Pioneer Factor NeuroD1 Rearranges  
980 Transcriptional and Epigenetic Profiles to Execute Microglia-Neuron Conversion." *Neuron*.  
981 <https://doi.org/10.1016/j.neuron.2018.12.010>.
- 982 Mattugini, Nicola, Riccardo Bocchi, Volker Scheuss, Gianluca Luigi Russo, Olof Torper, Chu Lan Lao,  
983 and Magdalena Götz. 2019. "Inducing Different Neuronal Subtypes from Astrocytes in the  
984 Injured Mouse Cerebral Cortex." *Neuron* 103 (6): 1086–1095.e5.  
985  
986

- 987 <https://doi.org/10.1016/j.neuron.2019.08.009>.
- 988 Mizutani, Ken Ichi. 2018. "Physiological Significance of Multipolar Cells Generated from Neural Stem  
989 Cells and Progenitors for the Establishment of Neocortical Cytoarchitecture." *Genes to Cells*.  
990 <https://doi.org/10.1111/gtc.12546>.
- 991 Neo, Wen Hao, Karen Yap, Suet Hoay Lee, Liang Sheng Looi, Piyush Khandelia, Sheng Xiong Neo,  
992 Eugene V. Makeyev, and I. Hsin Su. 2014. "MicroRNA MiR-124 Controls the Choice between  
993 Neuronal and Astrocyte Differentiation by Fine-Tuning Ezh2 Expression." *Journal of Biological  
994 Chemistry*. <https://doi.org/10.1074/jbc.M113.525493>.
- 995 Niu, Wenzhe, Tong Zang, Yuhua Zou, Sanhua Fang, Derek K. Smith, Robert Bachoo, and Chun Li Zhang.  
996 2013. "In Vivo Reprogramming of Astrocytes to Neuroblasts in the Adult Brain." *Nature Cell  
997 Biology* 15 (10): 1164–75. <https://doi.org/10.1038/ncb2843>.
- 998 Paraskevopoulou, Maria D., Dimitra Karagkouni, Ioannis S. Vlachos, Spyros Tastsoglou, and Artemis G.  
999 Hatzigeorgiou. 2018. "MicroCLIP Super Learning Framework Uncovers Functional  
1000 Transcriptome-Wide miRNA Interactions." *Nature Communications*.  
1001 <https://doi.org/10.1038/s41467-018-06046-y>.
- 1002 Pataskar, Abhijeet, Johannes Jung, Pawel Smialowski, Florian Noack, Federico Calegari, Tobias Straub,  
1003 and Vijay K Tiwari. 2016. "NeuroD1 Reprograms Chromatin and Transcription Factor Landscapes  
1004 to Induce the Neuronal Program." *The EMBO Journal*.  
1005 <https://doi.org/10.15252/embj.201591206>.
- 1006 Pimentel, Harold, Nicolas L. Bray, Suzette Puente, Páll Melsted, and Lior Pachter. 2017. "Differential  
1007 Analysis of RNA-Seq Incorporating Quantification Uncertainty." *Nature Methods*.  
1008 <https://doi.org/10.1038/nmeth.4324>.
- 1009 Rivetti Di Val Cervo, Pia, Roman A. Romanov, Giada Spigolon, Débora Masini, Elisa Martín-Montañez,  
1010 Enrique M. Toledo, Gioele La Manno, et al. 2017. "Induction of Functional Dopamine Neurons  
1011 from Human Astrocytes in Vitro and Mouse Astrocytes in a Parkinson's Disease Model." *Nature  
1012 Biotechnology*. <https://doi.org/10.1038/nbt.3835>.
- 1013 Sanuki, Rikako, Akishi Onishi, Chieko Koike, Rieko Muramatsu, Satoshi Watanabe, Yuki Muranishi,  
1014 Shoichi Irie, et al. 2011. "miR-124a Is Required for Hippocampal Axogenesis and Retinal Cone  
1015 Survival through Lhx2 Suppression." *Nature Neuroscience*. <https://doi.org/10.1038/nn.2897>.
- 1016 Scheckel, Claudia, Elodie Drapeau, Maria A. Frias, Christopher Y. Park, John Fak, Ilana Zucker-Scharff,  
1017 Yan Kou, et al. 2016. "Regulatory Consequences of Neuronal ELAV-like Protein Binding to Coding  
1018 and Non-Coding RNAs in Human Brain." *eLife*. <https://doi.org/10.7554/eLife.10421>.
- 1019 Schneider, Jay W., Zhengliang Gao, Shijie Li, Midhat Farooqi, Tie Shan Tang, Ilya Bezprozvanny, Doug  
1020 E. Frantz, and Jenny Hsieh. 2008. "Small-Molecule Activation of Neuronal Cell Fate." *Nature  
1021 Chemical Biology* 4 (7): 408–10. <https://doi.org/10.1038/nchembio.95>.
- 1022 Sirko, Svetlana, Gwendolyn Behrendt, Pia Annette Johansson, Pratibha Tripathi, Marcos Costa, Sarah  
1023 Bek, Christophe Heinrich, et al. 2013. "Reactive Glia in the Injured Brain Acquire Stem Cell  
1024 Properties in Response to Sonic Hedgehog Glia." *Cell Stem Cell*.  
1025 <https://doi.org/10.1016/j.stem.2013.01.019>.
- 1026 Torper, Olof, Ulrich Pfisterer, Daniel A. Wolf, Maria Pereira, Shong Lau, Johan Jakobsson, Anders  
1027 Björklund, Shane Grealish, and Malin Parmar. 2013. "Generation of Induced Neurons via Direct  
1028 Conversion in Vivo." *Proceedings of the National Academy of Sciences of the United States of  
1029 America* 110 (17): 7038–43. <https://doi.org/10.1073/pnas.1303829110>.
- 1030 Victor, Matheus B., Michelle Richner, Tracey O. Hermanstynne, Joseph L. Ransdell, Courtney Sobieski,  
1031 Pan Yue Deng, Vitaly A. Klyachko, Jeanne M. Nerbonne, and Andrew S. Yoo. 2014. "Generation  
1032 of Human Striatal Neurons by MicroRNA-Dependent Direct Conversion of Fibroblasts." *Neuron*.  
1033 <https://doi.org/10.1016/j.neuron.2014.10.016>.
- 1034 Victor, Matheus B., Michelle Richner, Hannah E. Olsen, Seong Won Lee, Alejandro M. Monteys,  
1035 Chunyu Ma, Christine J. Huh, et al. 2018. "Striatal Neurons Directly Converted from  
1036 Huntington's Disease Patient Fibroblasts Recapitulate Age-Associated Disease Phenotypes." *Nature  
1037 Neuroscience*. <https://doi.org/10.1038/s41593-018-0075-7>.
- 1038 Visvanathan, Jaya, Soo Kyung Seunghee Lee, Bora Lee, Jae W. Lee, and Soo Kyung Seunghee Lee.  
1039 2007. "The MicroRNA miR-124 Antagonizes the Anti-Neural REST/SCP1 Pathway during  
1040 Embryonic CNS Development." *Genes and Development*. <https://doi.org/10.1101/gad.1519107>.
- 1041 Vogel, Katharina U., Lewis S. Bell, Alison Galloway, Helena Ahlfors, and Martin Turner. 2016. "The  
1042 RNA-Binding Proteins Zfp361 and Zfp362 Enforce the Thymic  $\beta$ -Selection Checkpoint by  
1043 Limiting DNA Damage Response Signaling and Cell Cycle Progression." *The Journal of*



- 1044 *Immunology*. <https://doi.org/10.4049/jimmunol.1600854>.
- 1045 Volvert, Marie Laure, Pierre Paul Prévot, Pierre Close, Sophie Laguesse, Sophie Pirotte, James  
1046 Hemphill, Florence Rogister, et al. 2014. "MicroRNA Targeting of CoREST Controls Polarization  
1047 of Migrating Cortical Neurons." *Cell Reports*. <https://doi.org/10.1016/j.celrep.2014.03.075>.
- 1048 Wang, Yixuan, Qian Wu, Peng Yang, Chenfei Wang, Jing Liu, Wenyu Ding, Wensu Liu, et al. 2016.  
1049 "LSD1 Co-Repressor Rcor2 Orchestrates Neurogenesis in the Developing Mouse Brain." *Nature*  
1050 *Communications*. <https://doi.org/10.1038/ncomms10481>.
- 1051 Weng, Qinjie, Jincheng Wang, Jiajia Wang, Danyang He, Zuolin Cheng, Feng Zhang, Ravinder Verma, et  
1052 al. 2019. "Single-Cell Transcriptomics Uncovers Glial Progenitor Diversity and Cell Fate  
1053 Determinants during Development and Gliomagenesis." *Cell Stem Cell*.  
1054 <https://doi.org/10.1016/j.stem.2019.03.006>.
- 1055 Weyn-Vanhenhenryck, Sebastien M., Aldo Mele, Qinghong Yan, Shuying Sun, Natalie Farny, Zuo  
1056 Zhang, Chenghai Xue, et al. 2014. "HITS-CLIP and Integrative Modeling Define the Rbfox  
1057 Splicing-Regulatory Network Linked to Brain Development and Autism." *Cell Reports*.  
1058 <https://doi.org/10.1016/j.celrep.2014.02.005>.
- 1059 Wohl, Stefanie Gabriele, and Thomas Andrew Reh. 2016. "MiR-124-9-9\* Potentiates Ascl1-Induced  
1060 Reprogramming of Cultured Müller Glia." *GLIA*. <https://doi.org/10.1002/glia.22958>.
- 1061 Wu, Thomas D., and Serban Nacu. 2010. "Fast and SNP-Tolerant Detection of Complex Variants and  
1062 Splicing in Short Reads." *Bioinformatics*. <https://doi.org/10.1093/bioinformatics/btq057>.
- 1063 Xue, Yuanchao, Kunfu Ouyang, Jie Huang, Yu Zhou, Hong Ouyang, Hairi Li, Gang Wang, et al. 2013.  
1064 "Direct Conversion of Fibroblasts to Neurons by Reprogramming PTB-Regulated MicroRNA  
1065 Circuits." *Cell* 152 (1–2): 82–96. <https://doi.org/10.1016/j.cell.2012.11.045>.
- 1066 Yang, Chunzhang, Rajiv R. Iyer, Albert C.H. Yu, Raymund L. Yong, Deric M. Park, Robert J. Weil, Barbara  
1067 Ikejiri, Roscoe O. Brady, Russell R. Lonser, and Zhengping Zhuang. 2012. "β-Catenin Signaling  
1068 Initiates the Activation of Astrocytes and Its Dysregulation Contributes to the Pathogenesis of  
1069 Astrocytomas." *Proceedings of the National Academy of Sciences of the United States of*  
1070 *America*. <https://doi.org/10.1073/pnas.1118754109>.
- 1071 Yeom, Kyu Hyeon, Simon Mitchell, Anthony J. Linares, Sika Zheng, Chia Ho Lin, Xiao Jun Wang,  
1072 Alexander Hoffmann, and Douglas L. Black. 2018. "Polypyrimidine Tract-Binding Protein Blocks  
1073 MiRNA-124 Biogenesis to Enforce Its Neuronal-Specific Expression in the Mouse." *Proceedings*  
1074 *of the National Academy of Sciences of the United States of America*.  
1075 <https://doi.org/10.1073/pnas.1809609115>.
- 1076 Yoo, Andrew S., Brett T. Staahl, Lei Chen, and Gerald R. Crabtree. 2009. "MicroRNA-Mediated  
1077 Switching of Chromatin-Remodelling Complexes in Neural Development." *Nature*.  
1078 <https://doi.org/10.1038/nature08139>.
- 1079 Yoo, Andrew S., Alfred X. Sun, Li Li, Aleksandr Shcheglovitov, Thomas Portmann, Yulong Li, Chris Lee-  
1080 Messer, Ricardo E. Dolmetsch, Richard W. Tsien, and Gerald R. Crabtree. 2011. "MicroRNA-  
1081 Mediated Conversion of Human Fibroblasts to Neurons." *Nature*.  
1082 <https://doi.org/10.1038/nature10323>.
- 1083 Yuzwa, Scott A., Michael J. Borrett, Brendan T. Innes, Anastassia Voronova, Troy Ketela, David R.  
1084 Kaplan, Gary D. Bader, and Freda D. Miller. 2017. "Developmental Emergence of Adult Neural  
1085 Stem Cells as Revealed by Single-Cell Transcriptional Profiling." *Cell Reports*.  
1086 <https://doi.org/10.1016/j.celrep.2017.12.017>.
- 1087 Zhang, Lei, Jiu Chao Yin, Hana Yeh, Ning Xin Ma, Grace Lee, Xiangyun Amy Chen, Yanming Wang, et al.  
1088 2015. "Small Molecules Efficiently Reprogram Human Astroglial Cells into Functional Neurons."  
1089 *Cell Stem Cell*. <https://doi.org/10.1016/j.stem.2015.09.012>.
- 1090 Zhang, Ye, Kenian Chen, Steven A. Sloan, Mariko L. Bennett, Anja R. Scholze, Sean O’Keeffe, Hemali P.  
1091 Phatnani, et al. 2014. "An RNA-Sequencing Transcriptome and Splicing Database of Glia,  
1092 Neurons, and Vascular Cells of the Cerebral Cortex." *Journal of Neuroscience*.  
1093 <https://doi.org/10.1523/JNEUROSCI.1860-14.2014>.
- 1094
- 1095

## 1096 **Figure legends**

### 1097 **Figure 1: miR-124 is sufficient to instruct reprogramming of postnatal cortical astrocytes to** 1098 **iNs**

1099 **(A)** Overview of the miR-124-mediated reprogramming protocol. **(B)** Immunostaining of  
1100 astrocytes reprogrammed with miR-124 at day7 and day14 of the reprogramming protocol  
1101 with anti-Tuj1 antibody. **(C)** Quantification of the percentage of Tuj1+ reprogrammed cells  
1102 (average  $\pm$  SD, n=4 independent experiments, \*\*p<0.01 and \*\*\*p<0.001 versus sc-miRNA).  
1103 RT-qPCR analysis of the mRNA levels of the proneural TFs, *Mash1* and *Neurog2* **(D)**, the dorsal  
1104 telencephalon TFs, *Tbr2*, *Tbr1*, *Fezf2*, *Cux1* **(E)**, the ventral telencephalon TFs, *Gsx2* and *Dlx1*  
1105 **(F)**, and the neuronal differentiation TFs, *Sox4*, *Sox11*, *Hes6* and *NeuroD1* **(G)**. Data are  
1106 presented as fold change versus sc-miRNA (average  $\pm$  SD, n=3 independent experiments,  
1107 \*\*p<0.01 and \*\*\*p<0.001 versus sc-miRNA). **(H)** Co-immunostaining of astrocytes  
1108 reprogrammed with miR-124 at day7 of the reprogramming protocol with anti-Mash1/Tuj1,  
1109 anti-Tbr2/Tuj1 and anti-Gsx2/Tuj1 antibodies. **(I)** Quantification of the percentage of Mash1+,  
1110 Tbr2+ and Gsx2+ in Tuj1+ reprogrammed cells (average  $\pm$  SD, n=3 independent experiments,  
1111 \*\*p<0.01 and \*\*\*p<0.001 versus sc-miRNA).

### 1112 **Figure 2: The neurogenic compound ISX9 greatly enhances the miR-124-induced** 1113 **reprogramming efficiency and differentiation state of iNs**

1114 **(A)** Immunostaining of astrocytes reprogrammed with miR-124 or miR-124+ISX9 at day7 and  
1115 day14 of the reprogramming protocol with anti-Tuj1 antibody. **(B)** Quantification of the  
1116 percentage of Tuj1+ reprogrammed cells at the timepoints day1, day5, day7, day10 and day14  
1117 of the reprogramming protocol (average  $\pm$  SD, n=3 independent experiments for day5 and  
1118 day10, n=8 for day7 and n=4 for day14, \*p<0.05 and \*\*\*p<0.001 versus miR-124). **(C)** RT-qPCR  
1119 analysis of the mRNA levels of *NeuroD1* at day7 of the reprogramming protocol. Data are  
1120 presented as log<sub>2</sub>(fold change) versus sc-miRNA (average  $\pm$  SD, n=3 independent experiments,  
1121 \*\*p<0.01 and \*\*\*p<0.001 versus sc-miRNA). RT-qPCR analysis of the mRNA levels of the TFs,  
1122 *Neurog2* and *Tbr2* **(D)** and *Mash1* **(E)** at the time points day1, day5, day7, day10 and day14 of  
1123 the reprogramming protocol. Data are presented as log<sub>2</sub>(fold change) **(D)** and fold change **(E)**  
1124 versus astrocytes (day1) (average  $\pm$  SD, n=3 independent experiments, \*p<0.05, \*\*p<0.01 and  
1125 \*\*\*p<0.001 versus miR-124). **(F)** Co-immunostaining of astrocytes reprogrammed with miR-  
1126 124+ISX9 at day7 of the reprogramming protocol with anti-Mash1/Tuj1, anti-Tbr2/Tuj1 and  
1127 anti-Gsx2/Tuj1 antibodies. **(G)** Quantification of the percentage of Mash1+, Tbr2+ and Gsx2+  
1128 in Tuj1+ reprogrammed cells either with miR-124 or miR-124+ISX9 at day7 (average  $\pm$  SD, n=3

1129 independent experiments,  $**p < 0.01$  versus miR-124). Measurement of the mean nuclear  
1130 fluorescence intensity of Tbr2 **(H)** and Mash1 **(I)** in Tuj1+ reprogrammed cells either with miR-  
1131 124 or miR-124+ISX9 at day7 (co-immunostaining with anti-Tbr2/Mash1/Tuj1 antibodies). A  
1132 representative experiment is shown of n=3 independent experiments (mean  $\pm$  SD, n=326 cells  
1133 for miR-124 and n=540 cells for miR-124+ISX9,  $***p < 0.001$  versus miR-124).

1134 **Figure 3: miR-124+ISX9-iNs exhibit characteristics of mature, electrophysiologically active**  
1135 **neurons**

1136 **(A)** Co-immunostaining of miR-124+ISX9-iNs at day21 of the reprogramming protocol with  
1137 anti-MAP2/Tuj1 and anti-MAP2/Synapsin1 antibodies. Inset area indicated in white frame. **(B)**  
1138 Quantification of the percentage of Tuj1+ miR-124-iNs and miR-124+ISX9-iNs at day21 of the  
1139 reprogramming protocol. The percentage of MAP2/Syn1 double positive (DP) Tuj1+ iNs is  
1140 shown in blue (average  $\pm$  SD, n=3 independent experiments,  $***p < 0.001$  refers to  
1141 %MAP2/Syn1 DP in Tuj1+ miR-124+ISX9-iNs versus miR-124-iNs and  $####p < 0.001$  refers to  
1142 %Tuj1 miR-124+ISX9-iNs versus miR-124-iNs). **(C)** Co-immunostaining of miR-124+ISX9-iNs at  
1143 day28 of the reprogramming protocol with anti-vGlut1/Tuj1 antibodies. **(D)** Quantification of  
1144 the percentage of vGlut1+/Tuj1+ and GABA+/Tuj1+ miR-124+ISX9-iNs at day28 (average  $\pm$  SD,  
1145 n=3 independent experiments). **(E)** Superimposed traces of inward Na<sup>+</sup> currents and outward  
1146 K<sup>+</sup> currents evoked by depolarizing voltage steps obtained from a miR-124+ISX9-iN (day22)  
1147 (left panel). Superimposed traces of inward and outward currents evoked by the same  
1148 protocol after 1 min pre-application of 1 $\mu$ M TTX + 10mM TEA, showing the inhibition of both  
1149 inward and outward currents (middle panel), followed by full recovery of the current traces  
1150 after 3 min wash of the cell (right panel). **(F)** Superimposed traces of inward Na<sup>+</sup> currents and  
1151 outward K<sup>+</sup> currents evoked by depolarizing voltage steps obtained from a miR-124+ISX9-iN  
1152 (day27). **(G)** Example of a repetitive action potential induced from a mature miR-124+ISX9-iN  
1153 (day27) by different current steps (injections) at the current clamp mode (the protocol of  
1154 current clamp is shown upper right). **(H)** Example of a mature miR-124+ISX9-iN (day27) that  
1155 exhibits spontaneous post-synaptic activity at -70 mV holding potential. Representative  
1156 traces of ionic currents induced by application of the neurotransmitter GABA in two different  
1157 concentrations (300 $\mu$ M and 1mM) obtained from a miR-124+ISX9-iN in the early stage of  
1158 neuronal maturation (day22) **(I)** and the neurotransmitter glutamate in two different  
1159 concentrations (100 $\mu$ M and 300 $\mu$ M) obtained from a miR-124+ISX9-iN in the late stage of  
1160 maturation (day27) **(J)**. The cell membrane potential was held at -70 mV and the time of  
1161 agonist application is indicated in bars above the traces. **(K)** Superimposed traces obtained  
1162 from a mature miR-124+ISX9-iN (day 26) with application of 100  $\mu$ M glutamate (Glut) or co-

1163 application of 100 $\mu$ M Glut+CNQX indicated that the antagonist CNQX inhibits the AMPA/  
1164 kainate glutamate receptor.

1165 **Figure 4: RNA-Seq analysis revealed both independent and cooperative transcriptional**  
1166 **contributions of miR-124 and ISX9 in the reprogramming process**

1167 **(A)** Heat map analysis of 300 up- and down-regulated DEGs that belong to the GO terms: Glial  
1168 cell differentiation, Gliogenesis, Astrocyte development, Generation of neurons, Neuron  
1169 differentiation, Regulation of neuron differentiation, Neurotransmitter transport and Synaptic  
1170 signaling. **(B)** GO analysis of biological processes for the up-regulated DEGs in miR-124-iNs vs  
1171 astro (in orange) and miR-124+ISX9-iNs vs astro (in red). **(C)** GO analysis of biological processes  
1172 for the down-regulated DEGs in miR-124-iNs vs astro. GO terms are ranked according to  
1173  $\log_{10}$ FDR and the intensity legends indicate the fold enrichment of each GO term. **(D)** Heat  
1174 map analysis of 54 up-regulated differentially expressed TFs clustered according to the brain  
1175 region they are developmentally expressed (telencephalon, retina, midbrain and hindbrain).  
1176 **(E)** Heat map analysis of 40 up- and down-regulated RBPs.

1177 **Figure 5: The RNA-binding protein Zfp361l1 is a novel direct target of miR-124**

1178 **(A)** Venn diagram of the miR-124 targets, derived from AGO-HITS-CLIP and the down-  
1179 regulated DEGs of miR-124 vs sc-miRNA astro RNA-Seq data ( $\log_2$ (fold change) $\leq$ -1, FDR<0.01).  
1180 Identified miR-124 targets were combined with a public reference list of genes, expressed in  
1181 astrocytes, resulting in a set of 130 genes. **(B)** miR-124 direct binding to the 3' UTR of *Zfp361l1*  
1182 and *ZFP36L1*, in mouse and human species respectively. miR-124 binds with perfect seed  
1183 complementarity (7mer-M8 site) in both species. **(C)** RT-qPCR validation of the mRNA levels  
1184 of miR-124 direct target *Zfp361l1* at day7 (average  $\pm$  SD, n=3 independent experiments,  
1185 \*\*p<0.01 and \*\*\*p<0.001 vs sc-miRNA). **(D)** GO analysis of biological processes for Zfp361l1  
1186 direct targets that are also significantly up-regulated in miR-124-iNs vs sc-miRNA astro. GO  
1187 terms are ranked according to  $\log_{10}$ FDR and the intensity legend shows the fold enrichment  
1188 of each GO term. **(E)** Volcano plot comparing the  $\log_2$ (fold change) of TPM values in the miR-  
1189 124-iNs vs sc-miRNA astro condition versus the  $\log_{10}$ (FDR) values. Significantly up-regulated  
1190 ( $\log_2$ (fold change) $\geq$ 1, FDR<0.05) and down-regulated ( $\log_2$ (fold change) $\leq$ -1, FDR<0.05) genes  
1191 are shown in green and orange respectively. Labels of *Zfp361l1* and neuronal-specific up-  
1192 regulated genes that are also *Zfp361l1* direct targets are portrayed. **(F)** RT-qPCR validation of  
1193 the mRNA levels of the *Zfp361l1* targets *Elavl4*, *Nova1*, *Rbofox1*, *Rcor2* and *Tox* at day7 (average  
1194  $\pm$  SD, n=3 independent experiments, \*p<0.05, \*\*p<0.01 and \*\*\*p<0.001 versus sc-miRNA).

1195 **Figure 6: Targeting of Zfp36l1 by miR-124 plays a key role in the miR-124-induced cell fate**  
1196 **switch of astrocytes to iNs**

1197 **(A)** Schematic representation of the TSB binding region in the 3'UTR of *Zfp36l1* mRNA. **(B)**  
1198 Western blot analysis of the protein levels of Zfp36l1 in the absence or presence of increasing  
1199 concentrations of TSB (miR-124:TSB molecular ratio 4:1 and 2:1) at day5 of the  
1200 reprogramming protocol. Actin protein levels have been used as loading control for  
1201 normalization of Zfp36l1 protein levels. Normalized Zfp36l1 protein levels in sc-miRNA  
1202 transfected astrocytes have been set to 1 and the fold change of normalized Zfp36l1 protein  
1203 levels of each condition vs sc-miRNA is presented in the box below. **(C)** RT-qPCR analysis of  
1204 the mRNA levels of the Zfp36l1 targets *Tox*, *Rbfox1*, *Nova1*, *Rcor2* and *Elavl4* in the presence  
1205 or absence of increasing concentrations of TSB (miR-124:TSB molecular ratio 4:1, 2:1 and 1:1)  
1206 at day3 of the reprogramming protocol (average  $\pm$  SD, n=3 independent  
1207 experiments, \*p<0.05, \*\*p<0.01 and \*\*\*p<0.001 versus sc-miRNA and #p<0.05, ##p<0.01  
1208 versus miR-124). **(D)** Immunostaining of astrocytes reprogrammed with miR-124 or miR-124  
1209 along with increasing concentrations of TSB (4:1 and 2:1) with anti-Tuj1 antibody at day5 of  
1210 the reprogramming protocol. **(E)** Quantification of the percentage of Tuj1+ cells at day5  
1211 (average  $\pm$ SD, n=3 independent experiments \*p<0.05 and \*\*p<0.01 versus miR-124). **(F)**  
1212 Morphological characterization of Tuj1+ cells at day5. Quantification of the percentages of  
1213 multipolar Tuj1+ cells (3 or more processes extending from soma), Tuj1+ cells with 1-2  
1214 processes and Tuj1+ cells with an astrocyte-like morphology (rectangular soma with none or  
1215 1-2 processes) (average  $\pm$  SD, n=3 independent experiments, \*\*p<0.01 versus miR-124). **(G)**  
1216 Proposed model of independent and cooperative transcriptional and post-transcriptional  
1217 contributions of miR-124 and ISX9 in miR-124/ISX9-induced direct neuronal conversion of  
1218 cortical astrocytes: miR-124 represses astrocytic identity by down-regulating many astrocytic  
1219 genes and directly targeting the RBP Zfp36l1, leading to the up-regulation of the direct  
1220 Zfp36l1 targets and TFs *Tox* and *Rcor2*. *Tox* is known to up-regulate the cortical IP marker and  
1221 TF *Tbr2* (Artegiani et al. 2015), which is also further up-regulated by ISX9, along with the  
1222 neurogenic TFs *Neurog2* and *NeuroD1*. Additionally, miR-124-induced down-regulation of  
1223 *Zfp36l1* results in the up-regulation of the neuronal-specific RBPs *Nova1* and *Rbfox1*, the  
1224 latter being further strongly up-regulated by ISX9. These RBPs along with the strongly up-  
1225 regulated nElavl RBPs *Elavl2*, *Elavl3* and *Elavl4* by ISX9 contribute to the stabilization and  
1226 efficient translation of many neuronal mRNAs (J. A. Lee et al. 2016; Scheckel et al. 2016;  
1227 Weyn-Vanhentenryck et al. 2014). Finally ISX9 transcriptionally up-regulates many neuronal  
1228 maturation genes leading to the functional maturation of miR-124+ISX9-iNs. Post-

1229 transcriptional events and the RBPs are highlighted in blue, transcriptional events along with  
1230 the TFs are shown in green, while down-regulated genes and (blocked) inhibitory mechanisms  
1231 are shown in grey, (dashed lines present knowledge from the literature).

1232 **Figure 7: miR-124 induces reprogramming of resident reactive astrocytes to iNs with deep-**  
1233 **layer cortical identity *in vivo* following cortical trauma**

1234 **(A)** Experimental setup. **(B)** LV-124-transduced cells in the peritraumatic cortical parenchyma  
1235 expressing the mature neuronal marker NeuN, 3 weeks after viral transduction. Inset area  
1236 indicated in white frame. Scale bar 50 $\mu$ m. **(C)** Percentage of control LV-GFP and LV-124  
1237 transduced cells expressing the mature neuronal marker NeuN, 6 days and 3 weeks post-  
1238 transduction with or without treatment with ISX9. LV-GFP 6 days vs 3 weeks:  $p=0.104$ , LV-124  
1239 6 days vs 3 weeks:  $p^{**}=0.00116$ , LV-124 6 days vs LV-124-ISX9 3 weeks:  $p^{**}=0.00104$ , LV-GFP  
1240 3 weeks vs LV-124 3 weeks:  $p^{**}=0.0036$ , LV-GFP 3 weeks vs LV-124-ISX9 3 weeks:  
1241  $p^{**}=0.00337$ , LV-124 3 weeks vs LV-124-ISX9 3 weeks:  $p=0.8427$ ,  $n=4$  for all groups and time  
1242 points. **(D)** LV-miR-124-transduced cells in the peritraumatic cortical parenchyma expressing  
1243 the deep layer cortical neuronal marker Tbr1 3 weeks after viral transduction. Image from an  
1244 animal transduced with LV-miR-124 and co-treated with ISX9. Inset area indicated in white  
1245 frame. White arrows indicate NeuN+/Tbr1+ transduced cells. Scale bar 50 $\mu$ m. **(E)** Percentage  
1246 of LV-124-transduced cells expressing Tbr1, 3 weeks post-transduction with or without  
1247 treatment with ISX9. LV-124 3 weeks vs LV-124-ISX9 3 weeks:  $p=0.1503$ ,  $n=4$  for both groups.

1248

1249

1250

1251

1252

1253

1254

1255

1256

1257 **Table 1:** Sequences of primers for real-time PCR used in this study

| Gene           | Forward primer         | Reverse primer         |
|----------------|------------------------|------------------------|
| <b>Mash1</b>   | TCTCCGGTCTCGTCCTACTC   | CAAAGTCCATTCCCAGGAGA   |
| <b>Neurog2</b> | GTCCCCATACAGCTGCACTT   | CAGGTGAGGTGCATAACGGT   |
| <b>Tbr2</b>    | CACCCAGAATCTCCTAACACTG | AGCCTCGGTTGGTATTTGTG   |
| <b>Tbr1</b>    | TCCAGACGTTCACTTTTCCG   | CCCGTGTAGATCGTGCATAG   |
| <b>Cux1</b>    | AGCAGAGACTTTAAGGGAACAG | GCAGCCAACTCTACTTCTAGG  |
| <b>Fezf2</b>   | TTTGTGGCAAAGGCTTTCAC   | TCTTGTGTTGTGGGTGTG     |
| <b>Gsx2</b>    | GATTCCACTGCCTCTCCATG   | CGGGACAGGTACATATTGGAAG |
| <b>Dlx1</b>    | CAGTTCCTGTCAGTCCTAC    | ATTGTCCTGGGTTTACGGATC  |
| <b>Sox4</b>    | GAACGCCTTTATGGTGTGGT   | GAACGGAATCTTGTGCTGT    |
| <b>Sox11</b>   | CCCTGTCGCTGGTGGATAAG   | GGTCGGAGAAGTTCGCCTC    |
| <b>Hes6</b>    | TACCGAGGTGCAGGCCAA     | AGTTCAGCTGAGACAGTGGC   |
| <b>NeuroD1</b> | TTGAAGCCATGAATGCAGAG   | TCTTGGGCTTTTGTATCATCC  |
| <b>Scrt1</b>   | AATCATGCCAGGTCCTTC     | CCACGTAGTCACTGAGGTATC  |
| <b>Lhx6</b>    | GACACCATGATCGAGAACCTC  | CAATTGCTCTGCGGTGAAG    |
| <b>Chd5</b>    | ATCTACGAAATCTGGCACCG   | CCCTTGTGGATCTCAGACTTG  |
| <b>En1</b>     | CTACTCATGGGTTTCGGCTAAC | TCTTTAGCTTCTGCTGGTGGC  |
| <b>Foxa1</b>   | AGGGTTGGATGGTTGTGTC    | AGGCCGGAGTTCATGTTG     |
| <b>Lmx1b</b>   | CGGGATCGGAAACTGTACTG   | AGCAGAAACAGCCCAAGTG    |
| <b>Hoxc4</b>   | CAAGCAACCCATAGTCTACCC  | AACTCTTCTCTAATTCAGGACC |
| <b>Phox2a</b>  | TCCCTTCTCTGGAGTTCTGTC  | GATAATGCCAGGTCCAGAAGG  |
| <b>Elavl2</b>  | AATAACAGGGCAGAGCTTGG   | TCTGATTGAGGCTGAGCTTG   |
| <b>Elavl3</b>  | GGTTCGGGATAAGATCACAGG  | CAGAACTGGGACGTGCATAG   |
| <b>Elavl4</b>  | AGAATCCTGCAAACCTCGTGAG | ATGGTTTTGGTCTGGAGTCTG  |
| <b>Nova1</b>   | GCTGGCTACCTCTGGATCAT   | TGGGATGCCATTTAGCTTGC   |
| <b>Zfp36l1</b> | CACACCAGATCCTAGTCTTG   | CTGGGAGTGCTGTAGTTGAG   |
| <b>Zfp36</b>   | TCTCTTACCAAGGCCATTC    | GAGTCCGAGTTTATGTTCCAAG |
| <b>Rbpj</b>    | TCCCAAACCCGGATAACC     | TTTCGCATAGCTTCCCTAGTG  |
| <b>Tcf7l1</b>  | CTACAGCAACGACCACTTCTC  | GGTAATACGGTGACAGCTCAG  |

|               |                        |                        |
|---------------|------------------------|------------------------|
| <b>Tcf4</b>   | CACAAACCATTACAGCACCTC  | GTGTGGTCAGGAGAATAGATCG |
| <b>Nfic</b>   | GGACGGAAGACATAGAAGGAG  | GGGCTGTTGAATGGAGATTTG  |
| <b>Tox</b>    | TGCTCTCCAATTCCATCTCTG  | CTGTCTGATGTCTGTAGGCTG  |
| <b>Rcor2</b>  | GCATGTACCTGAGTCCTGAAG  | CTGCTATTGGTCTGCTTCATG  |
| <b>Rbfox1</b> | AGTTACGGACGAGTTTATGCTG | AGAGAACGAGACCCACATCA   |

1258



# Figure 1

**A**

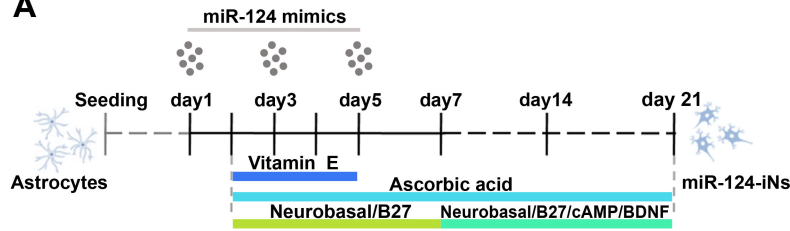

**B**

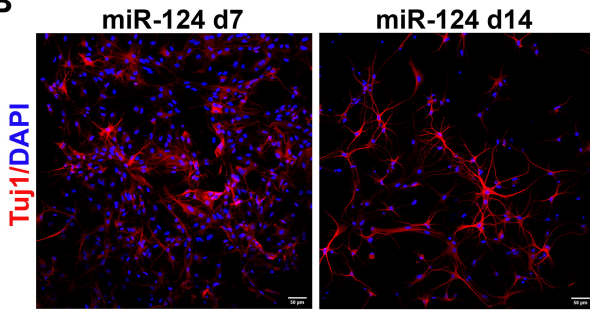

**C**

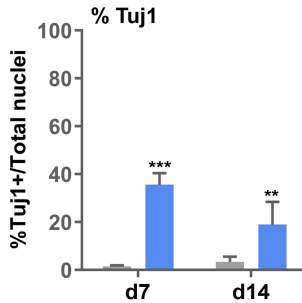

**D**

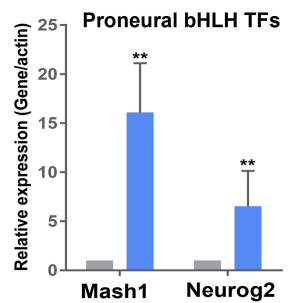

**E**

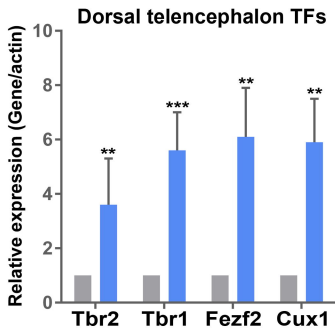

**F**

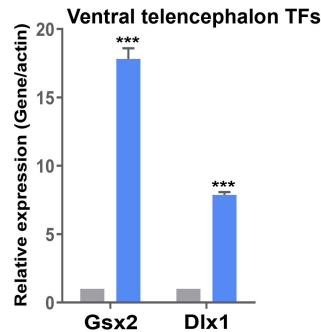

**G**

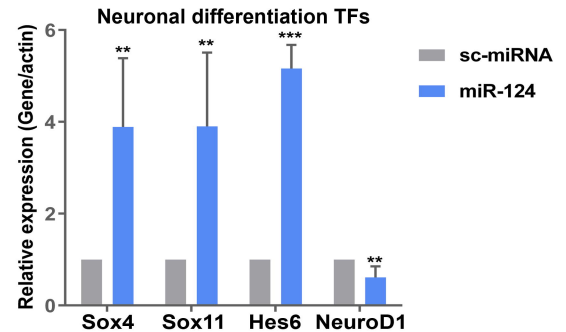

**H**

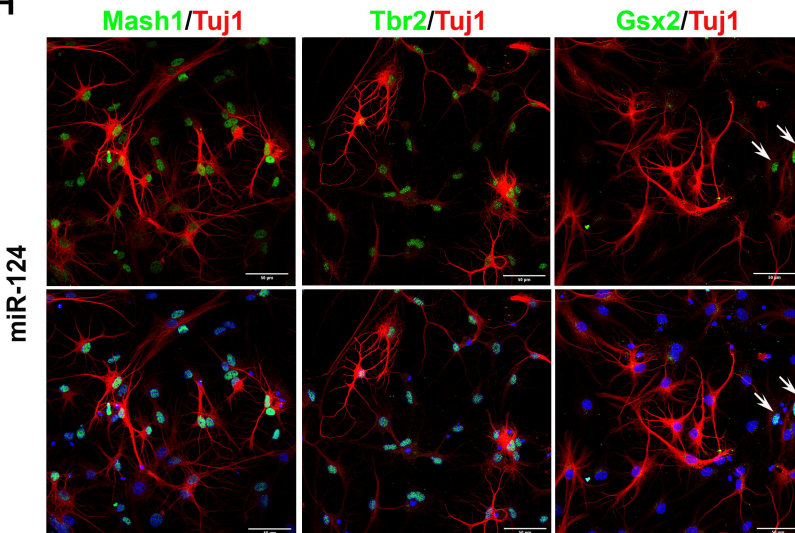

**I**

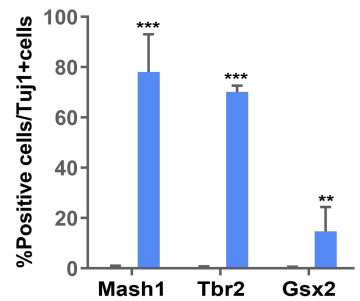

# Figure 2

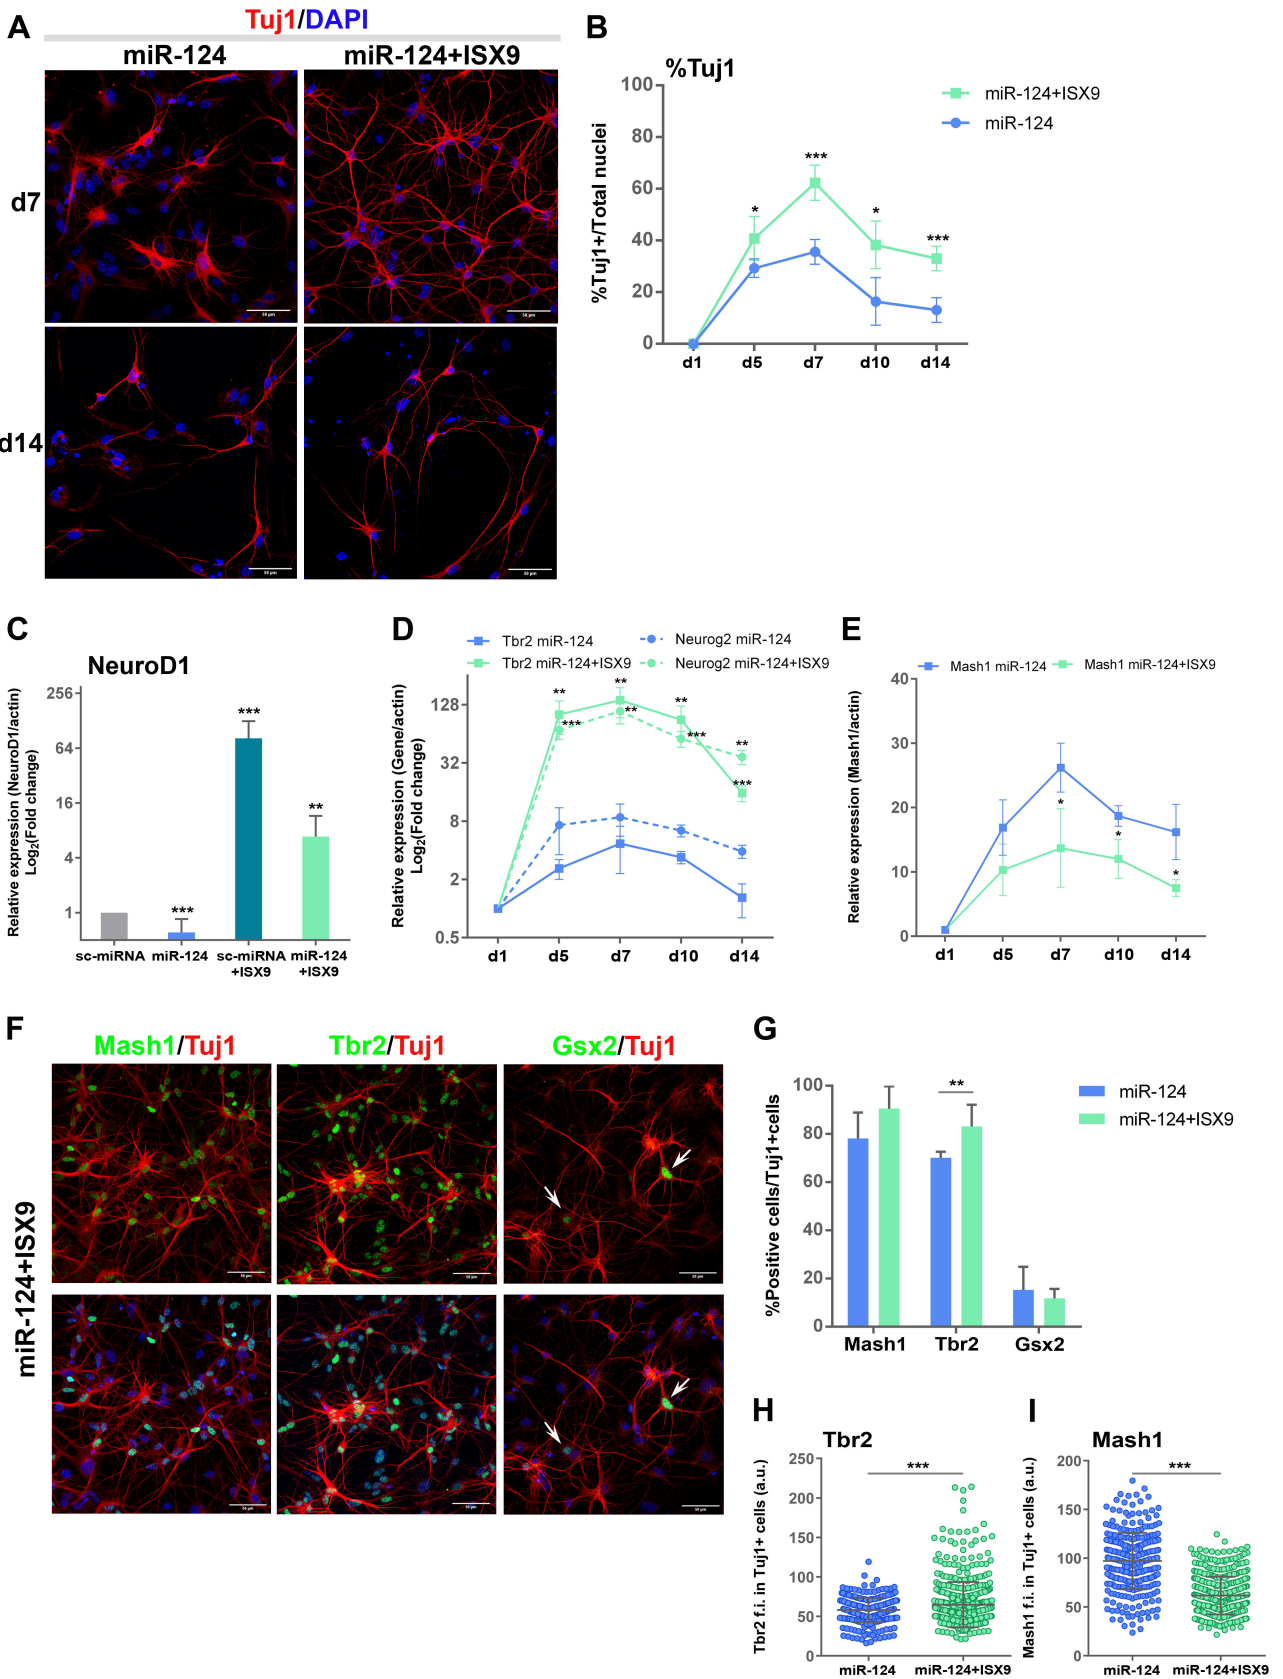

**Figure 3**

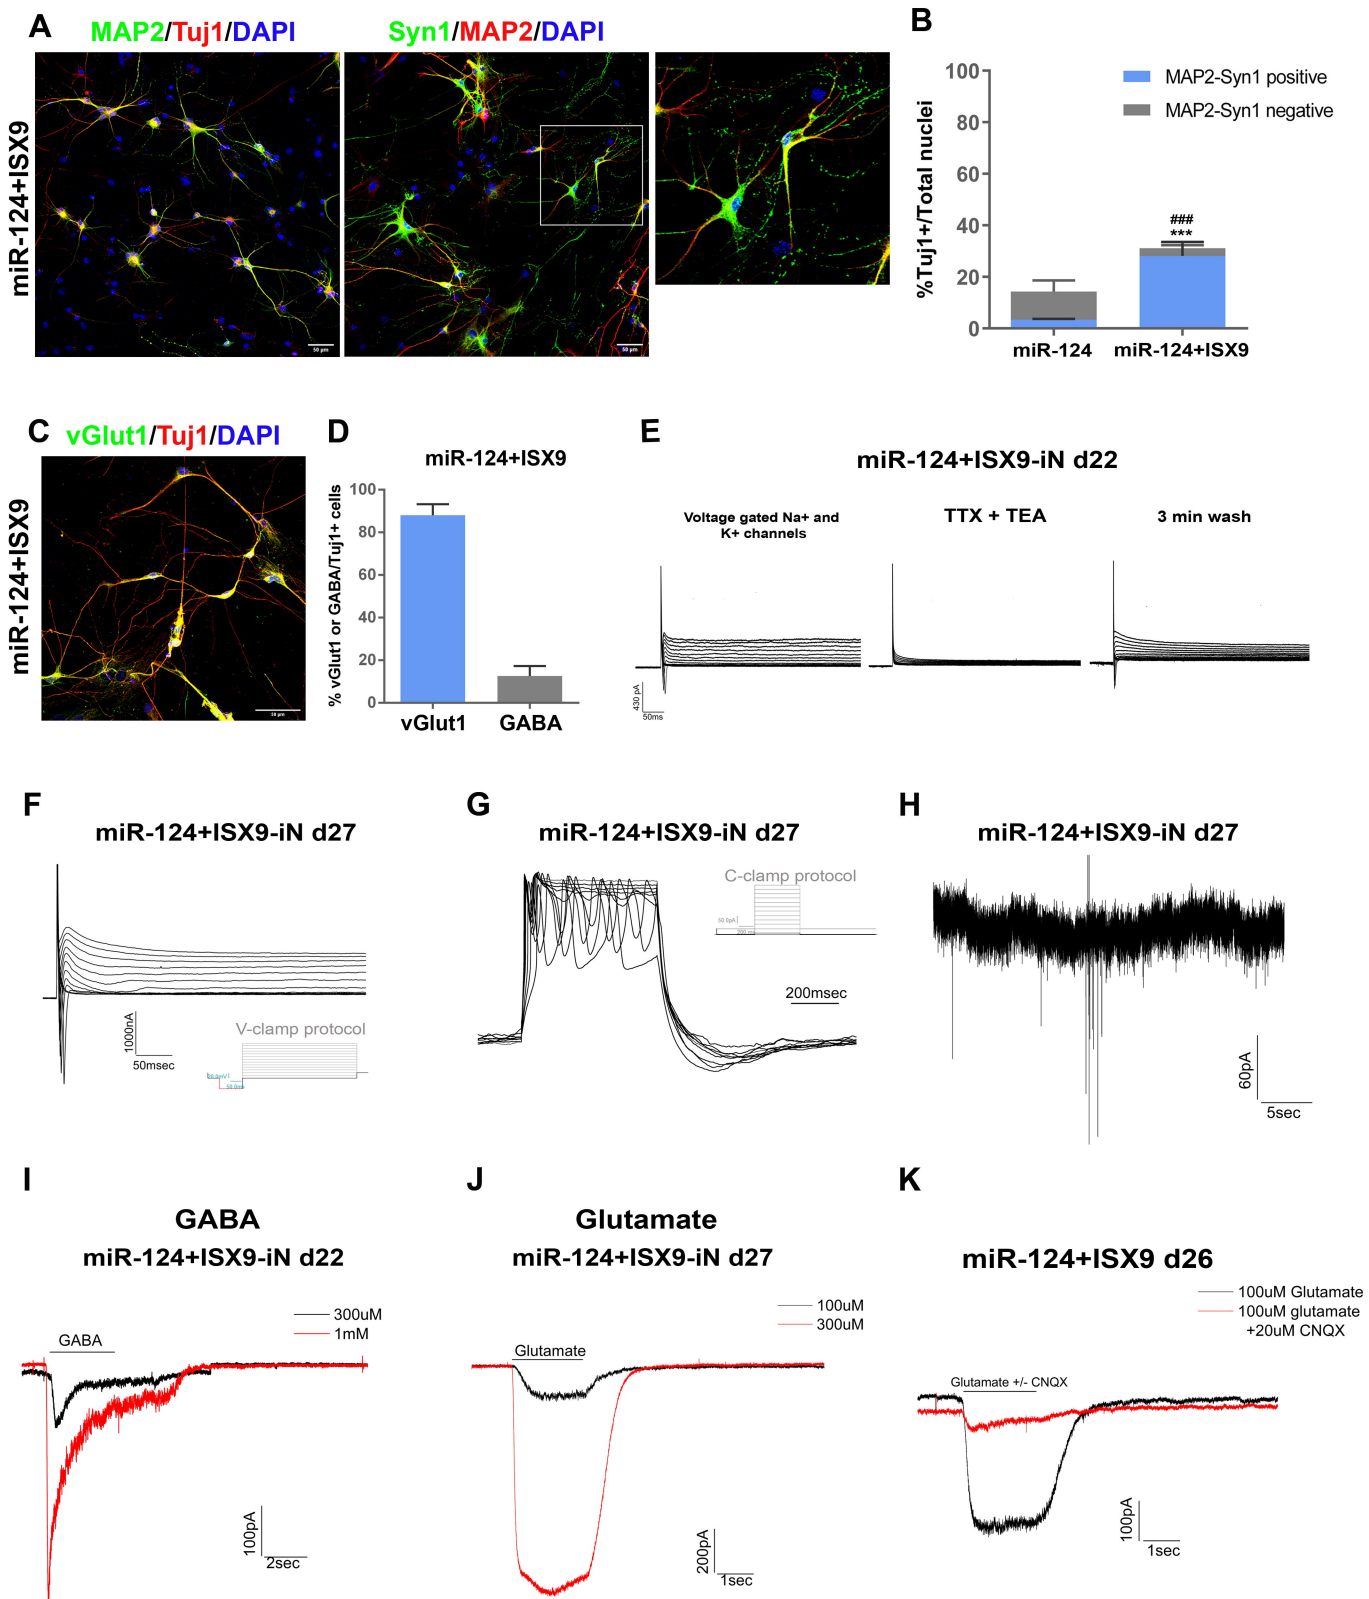

**Figure 4**

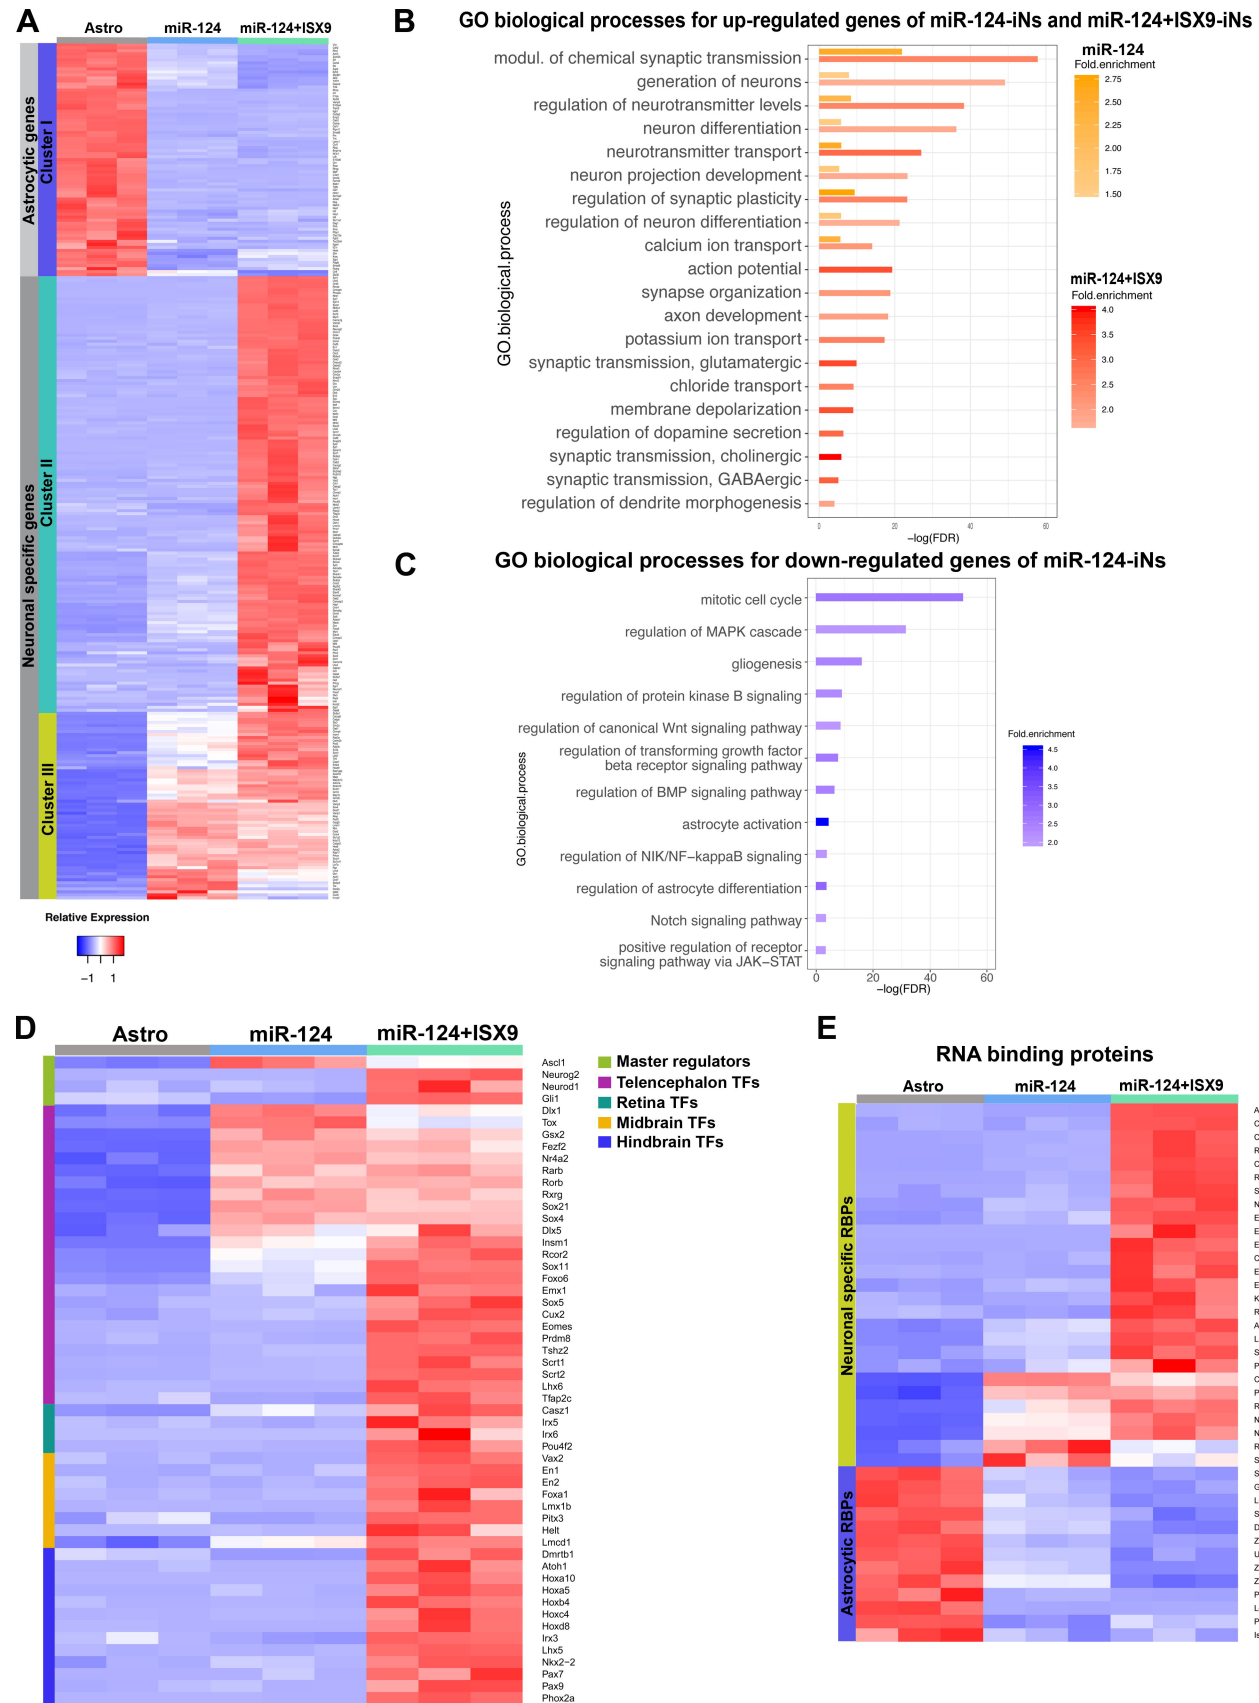

**Figure 5**

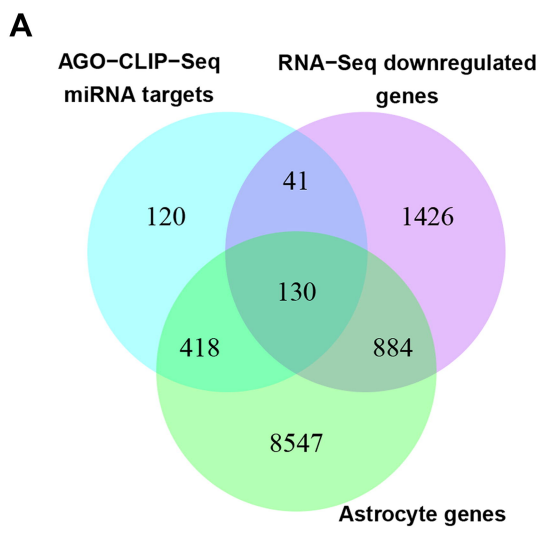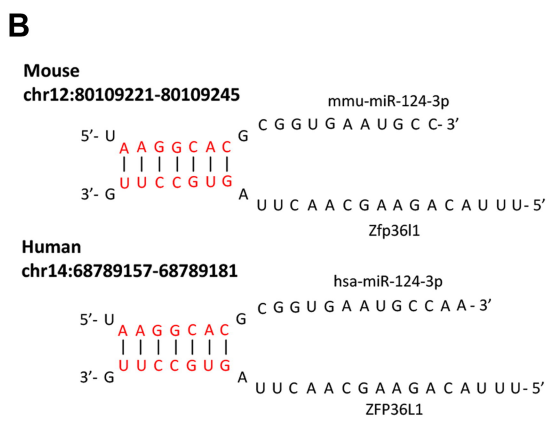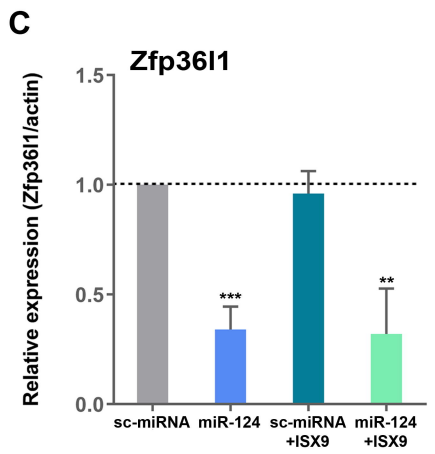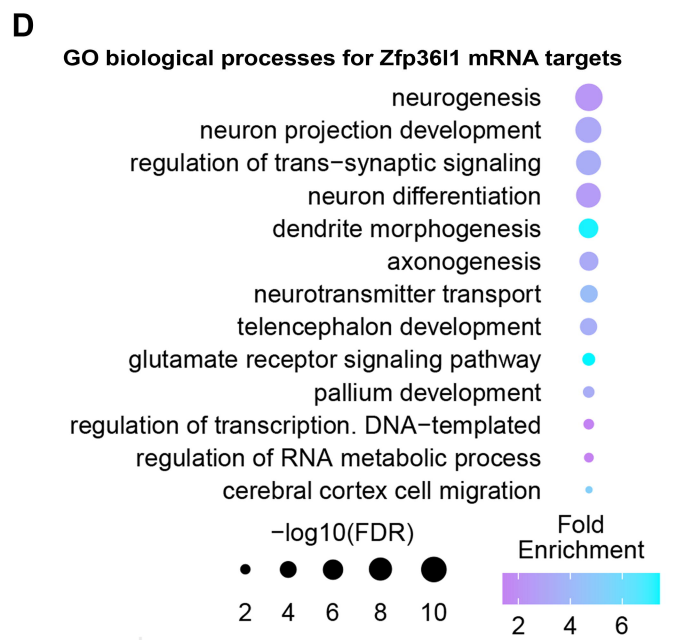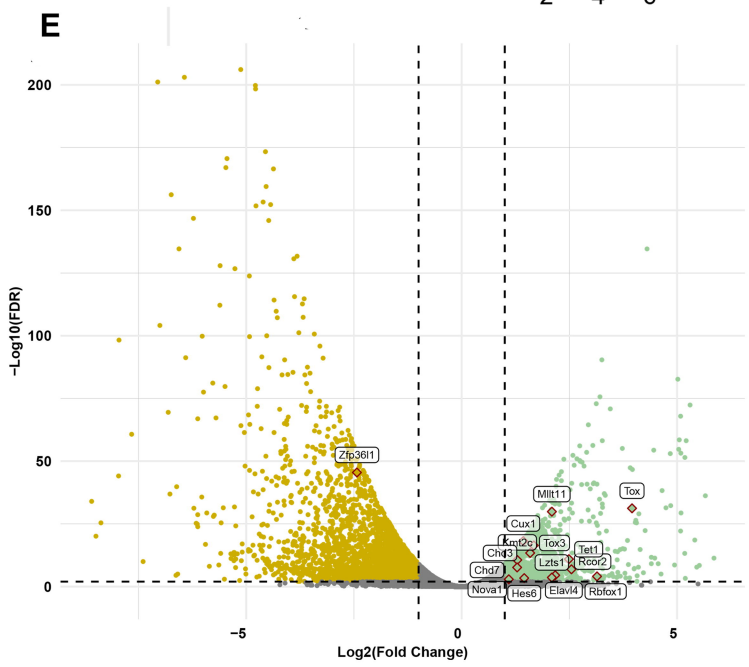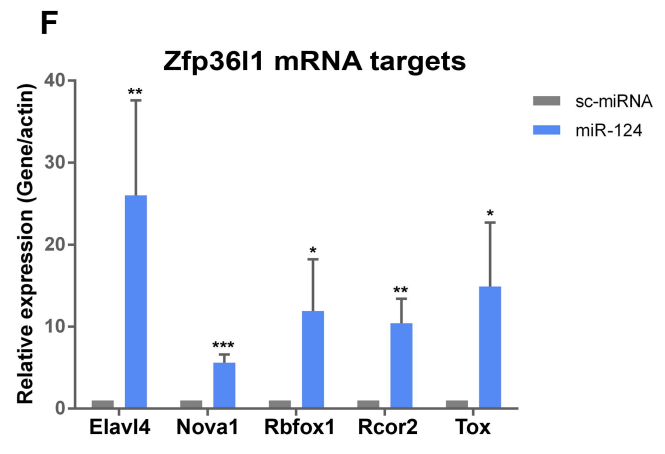

**Figure 6**

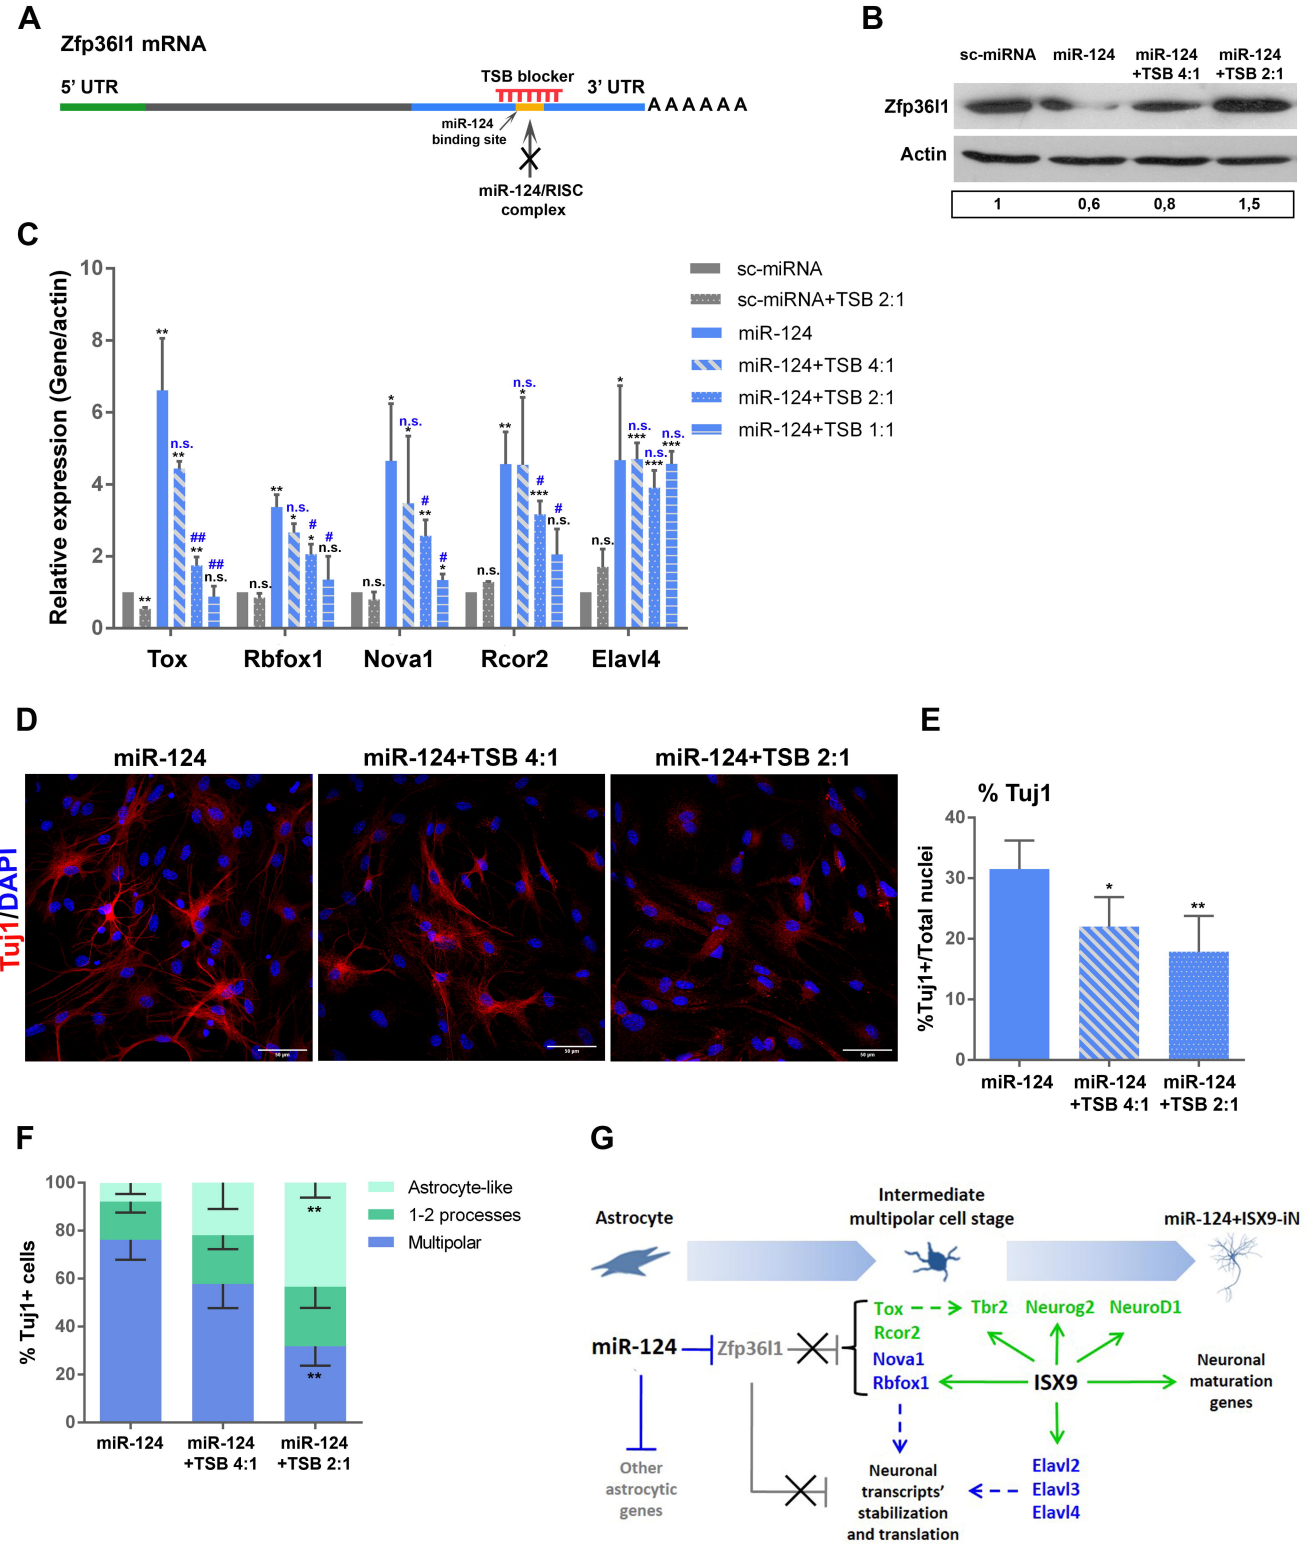

# Figure 7

**A**

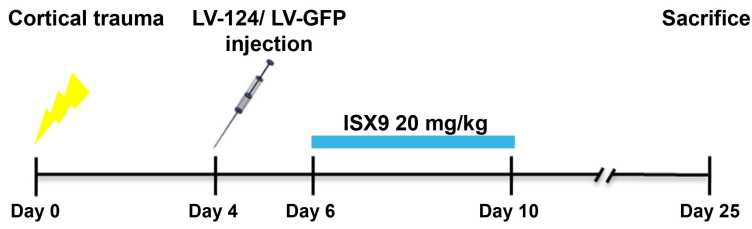

**B**

GFP/NeuN/Hoechst

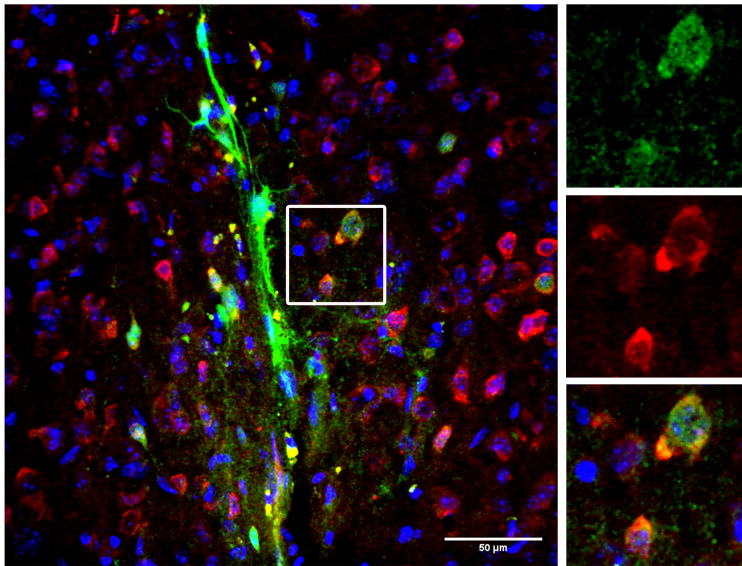

**C**

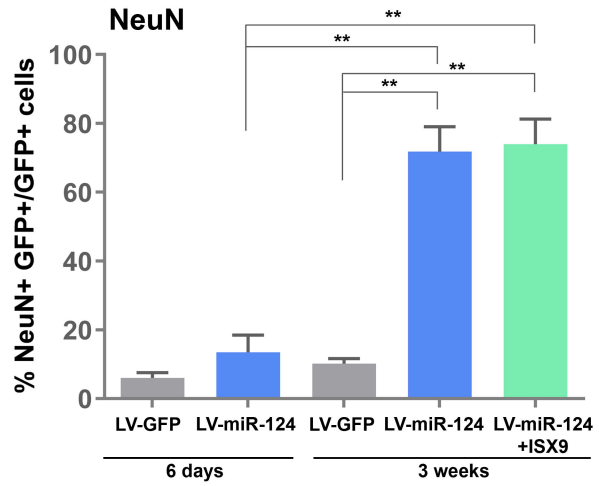

**D**

GFP/Tbr1/NeuN

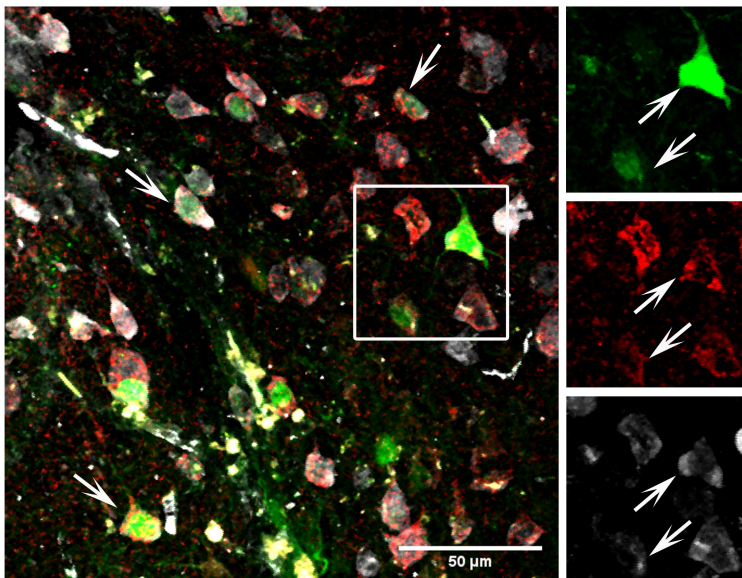

**E**

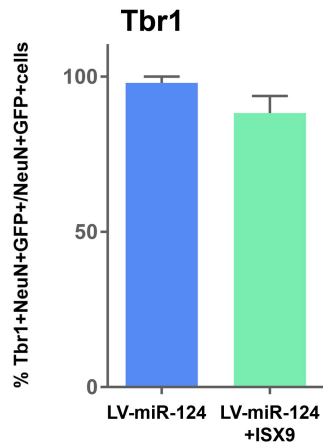

Source: https://www.biorxiv.org/content/biorxiv/early/2021/01/27/2020.06.01.127126.full.pdf
